# Supplementary material for: Predictive Design of Ultrastretchable Electrodes with Strain-Insensitive Performance via Machine Intelligence
Source: Research Square preprint supplement (doi:10.21203/rs.3.rs-4953573/v1), 2024-10-03
Supplement: Supplementary file 1 [file 407f627d04a67e15281010c1.pdf]

# **Predictive Design of Ultrastretchable Electrodes with Strain-Insensitive Performance *via* Machine Intelligence**

Haochen Yang<sup>a</sup>, Qiongyu Chen<sup>b</sup>, Tianle Chen<sup>a</sup>, Yang Li<sup>a</sup>, Elizabeth A. Norris<sup>a</sup>, Joshua M. Little<sup>a</sup>,  
Jiayue Sun<sup>c</sup>, Snehi Shrestha<sup>a</sup>, Shenqiang Ren<sup>d</sup>, Teng Li<sup>b\*</sup> & Po-Yen Chen<sup>a,e,\*</sup>

<sup>a</sup> Department of Chemical and Biomolecular Engineering, University of Maryland, College Park,  
MD 20742, United States

<sup>b</sup> Department of Mechanical Engineering, University of Maryland, College Park, MD 20742,  
United States

<sup>c</sup> Department of Chemistry, University of Maryland, College Park, MD 20742, United States

<sup>d</sup> Department of Materials Science and Engineering, University of Maryland, College Park, MD  
20742, United States

<sup>e</sup> Maryland Robotics Center, College Park, MD 20742, United States

\* Email: [lit@umd.edu](mailto:lit@umd.edu) (T.L.)

[checp@umd.edu](mailto:checp@umd.edu) (P.-Y. C.)

**Keywords:** Conductive interlayers; machine learning; collaborative robotics; stretchable gold  
conductors; strain-resilient zinc batteries.

## Table of Content

|                 |                                                                                                                         |    |
|-----------------|-------------------------------------------------------------------------------------------------------------------------|----|
| <b>Fig. S1</b>  | Schematic illustration of a model expansion strategy.                                                                   | 4  |
| <b>Fig. S2</b>  | Characterization of building blocks.                                                                                    | 5  |
| <b>Fig. S3</b>  | Fabrication of $G_1/G_2$ stretchable nanocomposites.                                                                    | 6  |
| <b>Fig. S4</b>  | Tunable wavelengths of $G_2$ -2D1D and $G_2$ -2D2D stretchable nanocomposites.                                          | 7  |
| <b>Fig. S5</b>  | Effect of thickness on the resistance–elongation curves of $G_1/G_2$ stretchable nanocomposites.                        | 8  |
| <b>Fig. S6</b>  | Fabrication of $G_0$ nanocomposites with controlled thicknesses.                                                        | 9  |
| <b>Fig. S7</b>  | Determination of a feasible parameter space.                                                                            | 10 |
| <b>Fig. S8</b>  | Response labels of $G_1/G_2$ stretchable nanocomposites.                                                                | 11 |
| <b>Fig. S9</b>  | Performance of $G_1/G_2$ stretchable nanocomposites upon slight composition variations.                                 | 12 |
| <b>Fig. S10</b> | Measurement variations across $G_1/G_2$ stretchable nanocomposites replicates.                                          | 13 |
| <b>Fig. S11</b> | Cumulative numbers of $G_1/G_2$ stretchable nanocomposites fabricated across active learning loops.                     | 14 |
| <b>Fig. S12</b> | Spatial distributions of $G_1/G_2$ stretchable nanocomposites in the feasible parameter space.                          | 15 |
| <b>Fig. S13</b> | Comparison between model-predicted and actual electrical conductance.                                                   | 16 |
| <b>Fig. S14</b> | Statistical analyses between fabrication parameters and nanocomposite properties.                                       | 17 |
| <b>Fig. S15</b> | Working mechanism of Shapley Additive exPlanations (SHAP) model interpretation.                                         | 18 |
| <b>Fig. S16</b> | SHAP interpretation on the $S_0$ of $G_1/G_2$ stretchable nanocomposites.                                               | 19 |
| <b>Fig. S17</b> | Violin plots of $G_1/G_2$ stretchable nanocomposites.                                                                   | 20 |
| <b>Fig. S18</b> | Two-scale FE modeling of $G_1/G_2$ stretchable nanocomposites.                                                          | 21 |
| <b>Fig. S19</b> | SEM images of a $G_2$ -2D2D gold conductor during a continuous elongation loading process from 0% to 1,300%.            | 22 |
| <b>Fig. S20</b> | Crack density and area measurement of a $G_2$ -2D2D stretchable gold conductor.                                         | 23 |
| <b>Fig. S21</b> | Photographs of stretchable Zn and $MnO_2$ electrodes.                                                                   | 24 |
| <b>Fig. S22</b> | Electrochemical characterizations of a stretchable Zn// $MnO_2$ battery at its relaxed state and under 300% elongation. | 25 |
| <b>Note S1</b>  | Rationale of building block selection and model expansion strategy for $G_1/G_2$ stretchable nanocomposites.            | 26 |
| <b>Note S2</b>  | Tunable wavelengths of $G_2$ -2D1D and $G_2$ -2D2D stretchable nanocomposites.                                          | 27 |
| <b>Note S3</b>  | Estimated number of experiments required to build an extensive dataset for $G_1/G_2$ stretchable nanocomposites.        | 28 |
| <b>Note S4</b>  | Necessity of multistage ML framework.                                                                                   | 29 |
| <b>Note S5</b>  | Training of a support vector machine (SVM) regression model.                                                            | 31 |
| <b>Note S6</b>  | User Input Principle (UIP) method for data augmentation.                                                                | 33 |
| <b>Note S7</b>  | Calculation of <i>A Score</i> acquisition function.                                                                     | 34 |
| <b>Note S8</b>  | SHAP model interpretation.                                                                                              | 36 |
| <b>Note S9</b>  | Two-scale finite element (FE) models of $G_1/G_2$ stretchable nanocomposites.                                           | 39 |
| <b>Note S10</b> | Clustering analysis.                                                                                                    | 42 |



|                              |                                                                                                                                                               |    |
|------------------------------|---------------------------------------------------------------------------------------------------------------------------------------------------------------|----|
| <b>Note S11</b>              | Crack propagation of $G_2$ -2D2D stretchable gold conductors.                                                                                                 | 43 |
| <b>Table S1</b>              | Photos of 286 $G_0$ nanocomposites with different MXene/SWNT/AuNP/PVA ratios as the training data points for the SVM regression model.                        | 44 |
| <b>Table S2</b>              | Electrical conductance of 286 $G_0$ electrodes with different MXene/SWNT/AuNP/PVA ratios as the training data points for the SVM regression model.            | 56 |
| <b>Table S3</b>              | Photos of 42 $G_0$ nanocomposites with different MXene/SWNT/AuNP/PVA ratios as the testing data points for the SVM regression model.                          | 64 |
| <b>Table S4</b>              | Electrical conductance of 42 $G_0$ nanocomposites with different MXene/SWNT/AuNP/PVA ratios as the testing data points for the SVM regression model.          | 66 |
| <b>Table S5</b>              | Training data points for the prediction model.                                                                                                                | 68 |
| <b>Table S6</b>              | Testing data points for the prediction model.                                                                                                                 | 74 |
| <b>Table S7</b>              | 10 fabrication parameter sets of $G_1/G_2$ stretchable nanocomposites to examine the model's prediction accuracy.                                             | 75 |
| <b>Table S8</b>              | Correlation parameters used in the deflection functions of FE models.                                                                                         | 76 |
| <b>Table S9</b>              | Summary of influential components identified in different data analysis methods.                                                                              | 76 |
| <b>Table S10</b>             | Comparison of our robotics/ML-integrated framework with the state-of-the-art works in the fields of stretchable conductors.                                   | 77 |
| <b>Table S11</b>             | Fitted EIS parameters of stretchable Zn//MnO <sub>2</sub> batteries at different stretching states.                                                           | 79 |
| <b>Table S12</b>             | Comparison of our stretchable Zn//MnO <sub>2</sub> battery with the state-of-the-art stretchable Zn-based and Li-ion batteries with co-planar configurations. | 80 |
| <b>Movie S1</b>              | Automated pipetting robot for preparing various MXene/SWNT/AuNP/PVA mixtures.                                                                                 | 82 |
| <b>Movie S2</b>              | FE simulation of $G_2$ -2D1D and $G_2$ -2D2D stretchable nanocomposites under uniaxial elongations in top and perspective views.                              | 82 |
| <b>Supporting References</b> |                                                                                                                                                               | 83 |

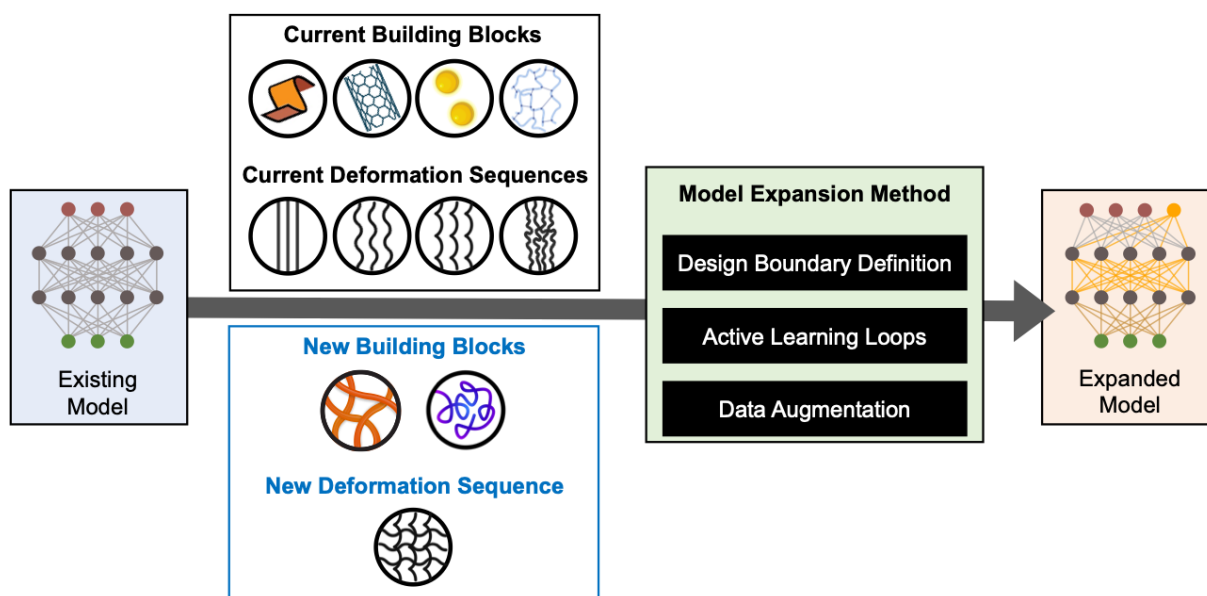

**Fig. S1. Schematic illustration of a model expansion strategy.** Workflow of a model expansion method.

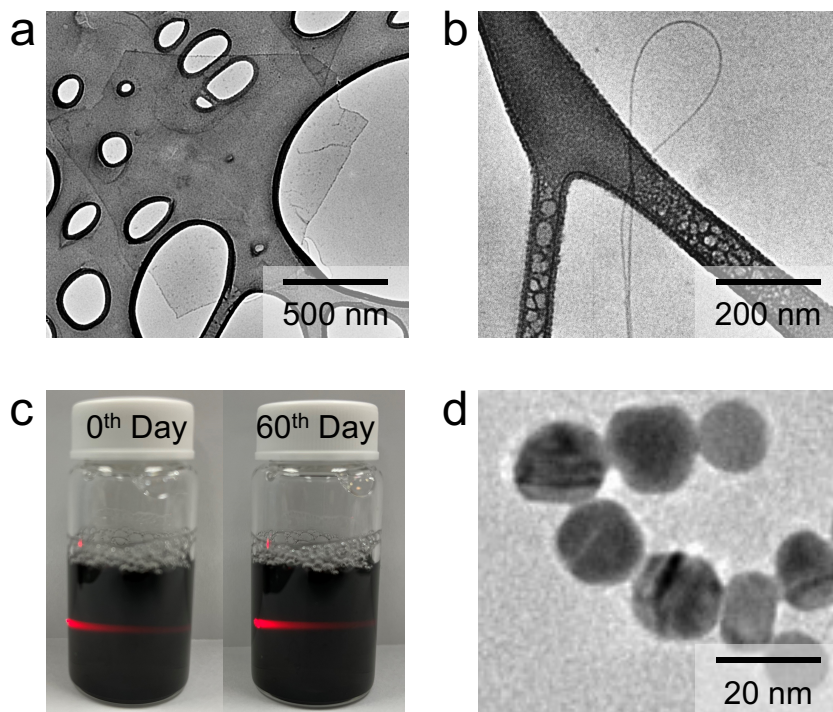

**Fig. S2. Characterization of building blocks.** (a) TEM image of  $\text{Ti}_3\text{C}_2\text{T}_x$  MXene nanosheets, with an average lateral dimension of  $1 \times 1 \mu\text{m}^2$ . (b) TEM image of single-walled carbon nanotubes (SWNTs), with an average diameter of 1 nm and an average length of 10  $\mu\text{m}$ . (c) Tyndall effect of SWNT dispersion that contained sodium dodecyl sulfate (SDS). No SWNT aggregation was observed after ambient storage for 60 days. (d) TEM image of gold nanoparticles (AuNPs), with an average diameter of 20 nm.

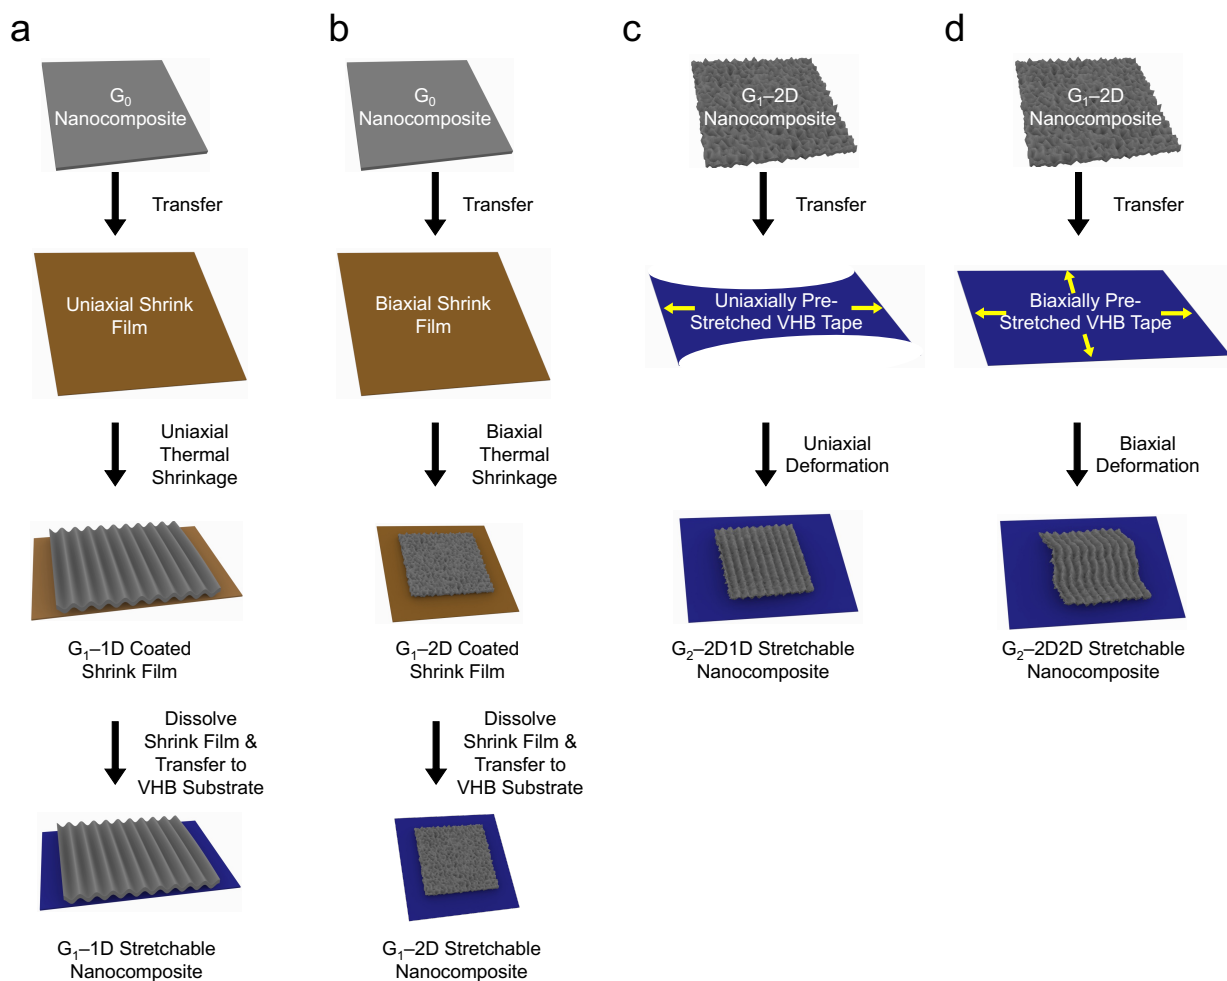

**Fig. S3. Fabrication of  $G_1/G_2$  stretchable nanocomposites.** (a) Fabrication of  $G_1$ -1D stretchable nanocomposites using uniaxial shrink films. (b) Fabrication of  $G_1$ -2D stretchable nanocomposites using biaxial shrink films. (c) Fabrication of  $G_2$ -2D1D stretchable nanocomposites using biaxial shrink films and uniaxially pre-stretched VHB substrates sequentially. (d) Fabrication of  $G_2$ -2D2D stretchable nanocomposites using biaxial shrink films and biaxially pre-stretched VHB substrates sequentially.

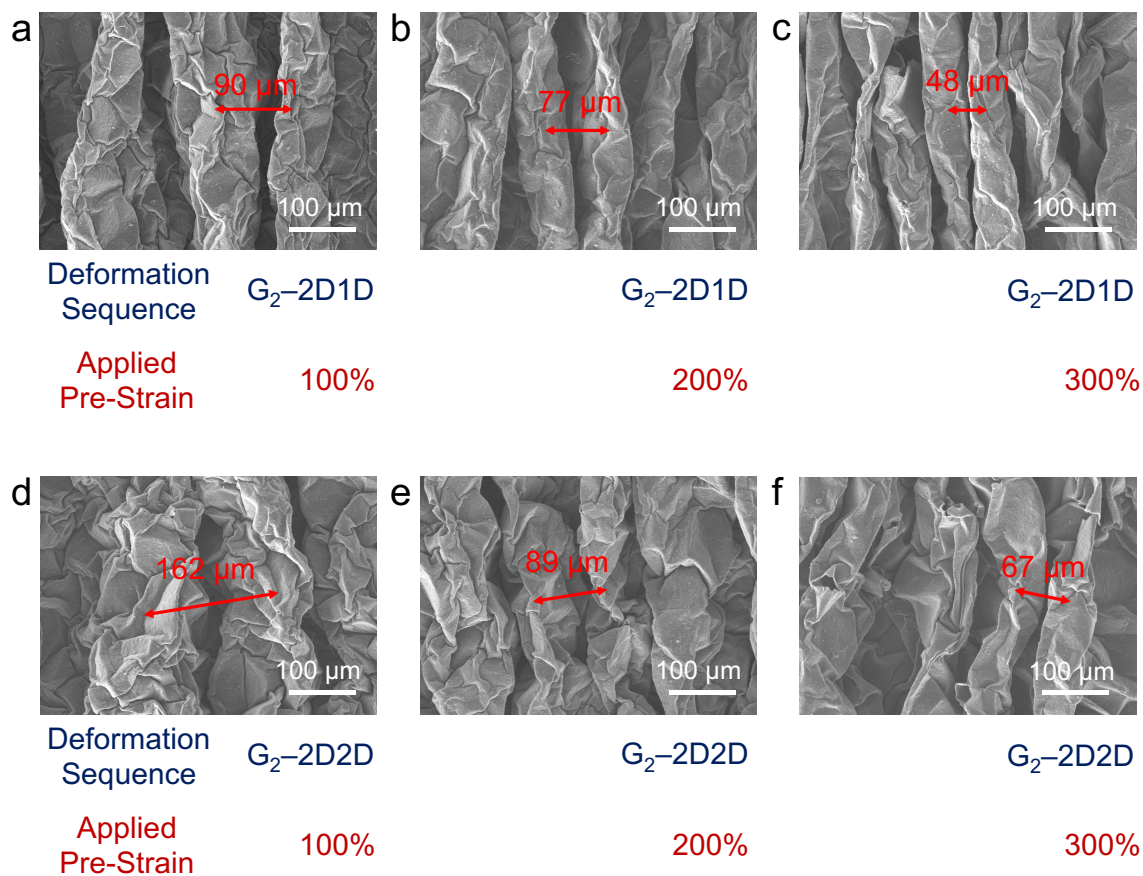

**Fig. S4. Tunable wavelengths of G<sub>2</sub>-2D1D and G<sub>2</sub>-2D2D stretchable nanocomposites.** (a)–(c) Wavelengths of G<sub>2</sub>-2D1D stretchable nanocomposites were tunable from 90 to 48 μm by controlling the applied pre-strains of VHB substrates from 100% to 300%, respectively. (d)–(f) Wavelengths of G<sub>2</sub>-2D2D stretchable nanocomposites were tunable from 162 to 67 μm by controlling the applied pre-strains of VHB substrates from 100% to 300%, respectively.

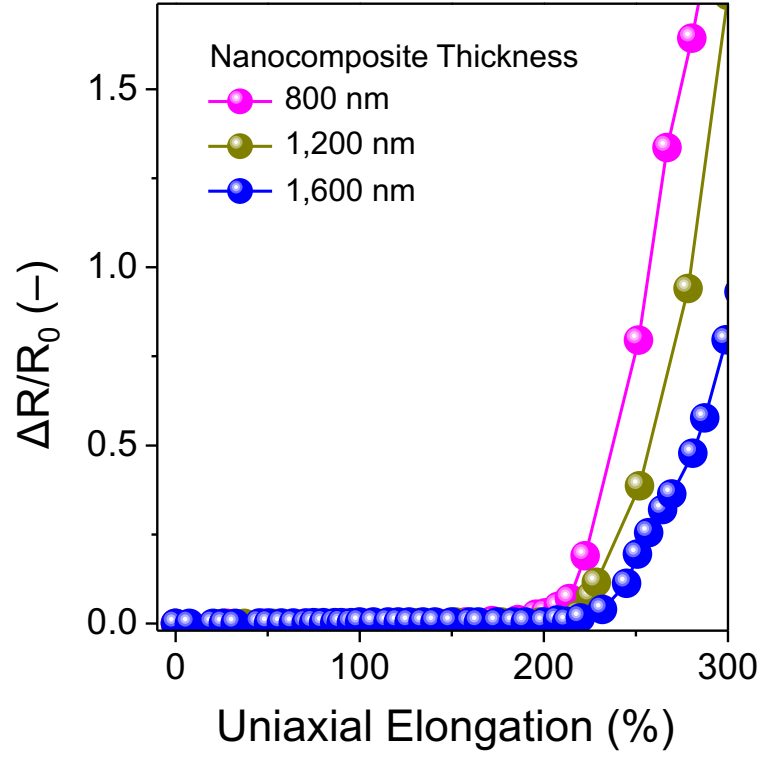

**Fig. S5. Effect of thickness on the resistance–elongation curves of  $G_1/G_2$  stretchable nanocomposites.** Resistance–elongation curves of various  $G_2$ –2D1D stretchable nanocomposites with different thicknesses. All  $G_2$ –2D1D nanocomposites were at the same MXene/SWNT/AuNP/PVA ratio of 45/45/8/2, and the applied pre-strain was controlled to be the same at 100%.

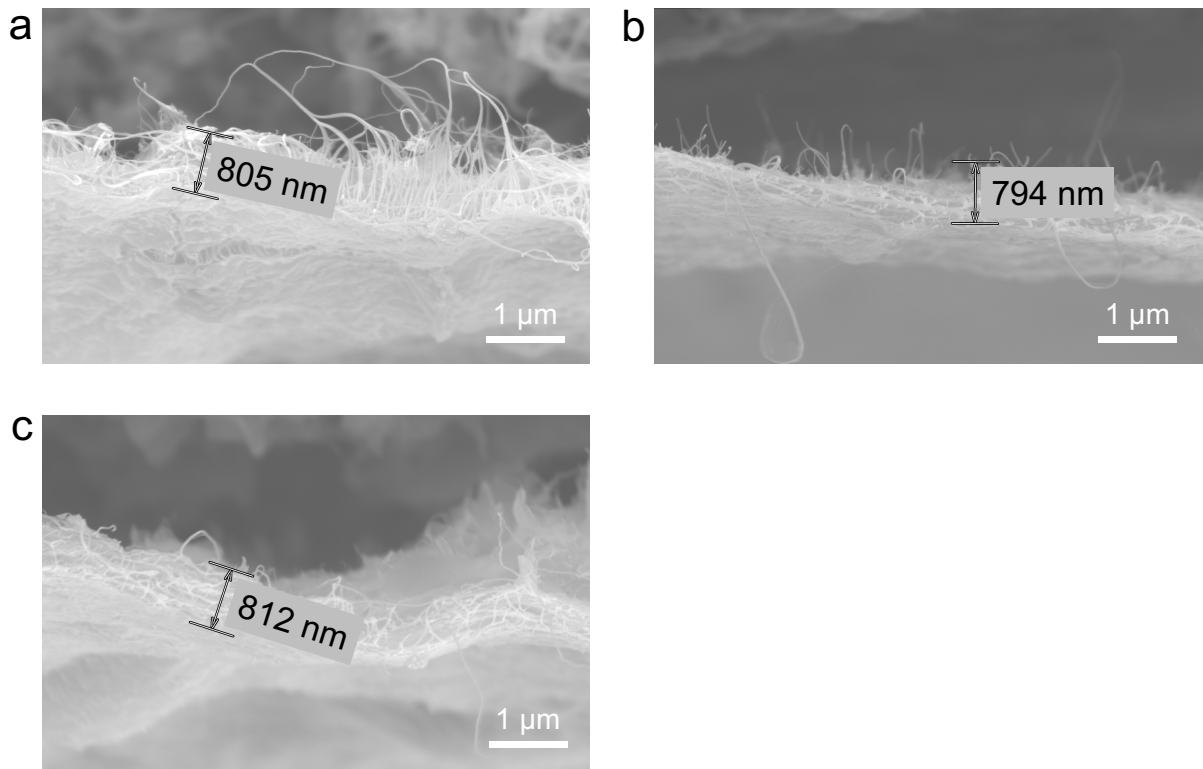

**Fig. S6. Fabrication of  $G_0$  nanocomposites with controlled thicknesses.** During the SVM model construction, the thicknesses of all  $G_0$  nanocomposites were controlled to be  $\sim 800$  nm. The MXene/SWNT/AuNP/PVA ratios of three  $G_0$  nanocomposites were (a) 10.1/79.5/5.7/4.7, (b) 40.3/41.2/8.7/9.8, and (c) 61.2/25.3/12.4/1.1.

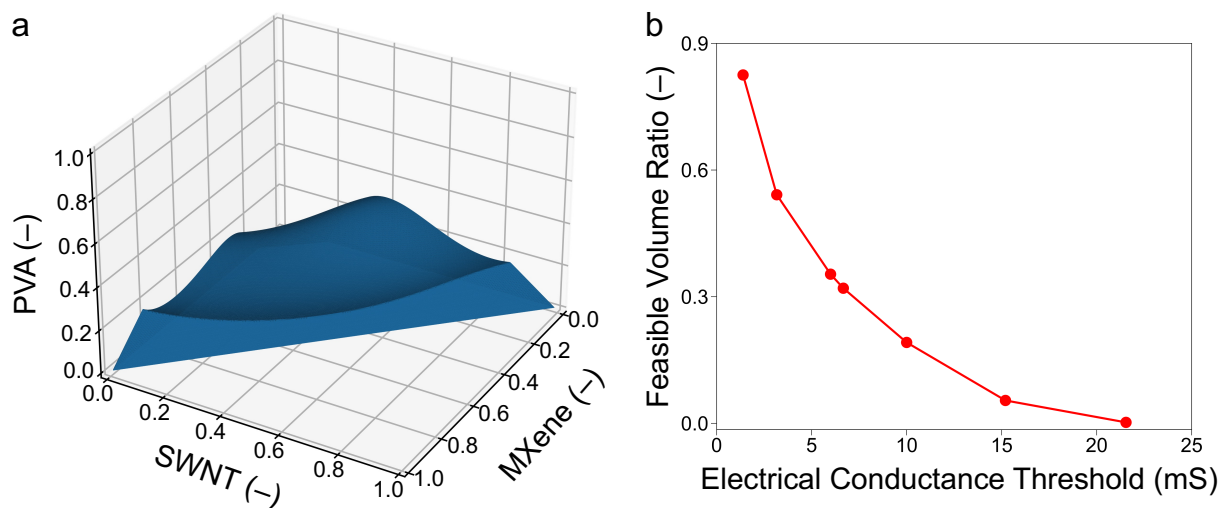

**Fig. S7. Determination of a feasible parameter space.** (a) Feasible parameter space of  $G_0$  nanocomposites with high electrical conductance values  $>6.67$  mS. (b) By selecting the iso-surfaces with different electrical conductance values, the volume of a feasible parameter space changed accordingly. By setting the electrical conductance value of 6.67 mS as the threshold, a feasible parameter space was defined and held  $\sim 34\%$  of the entire parameter space.



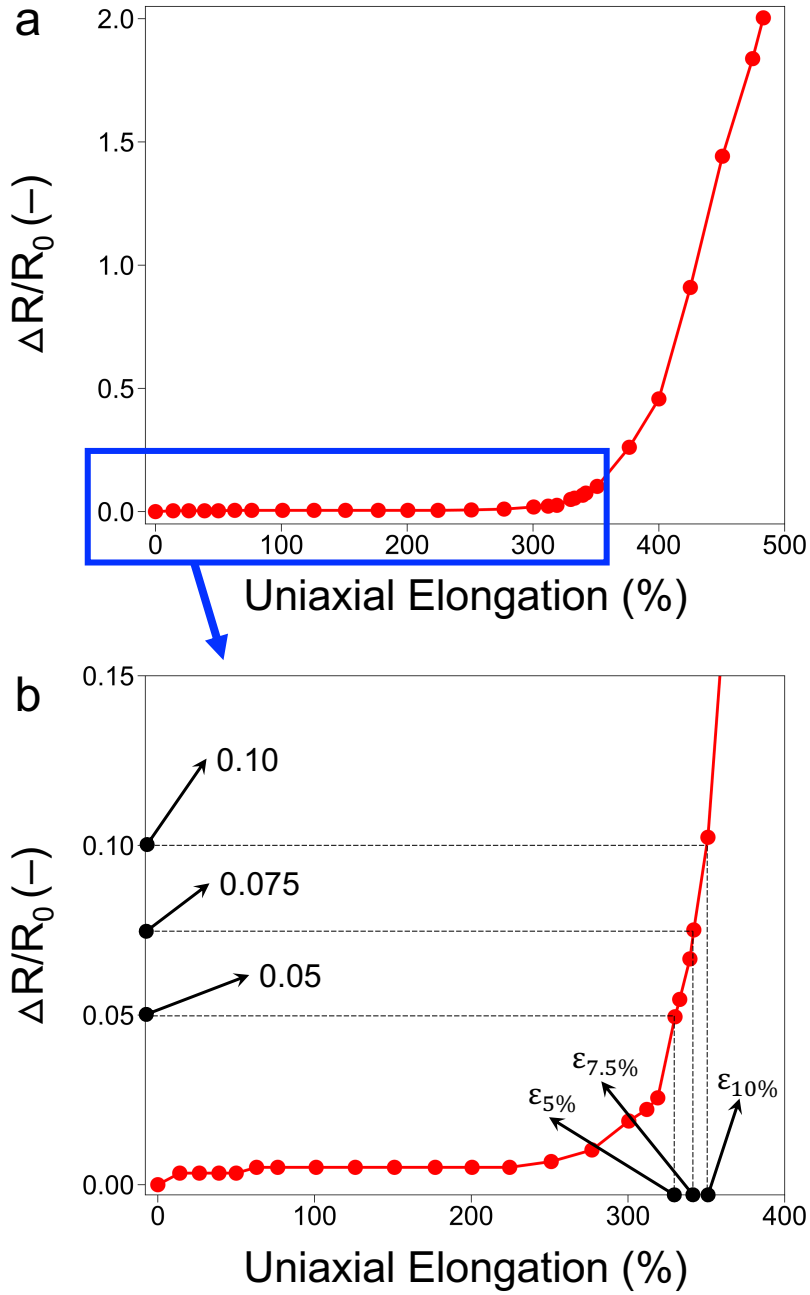

**Fig. S8. Response labels of G<sub>1</sub>/G<sub>2</sub> stretchable nanocomposites.** A resistance–elongation profile of a G<sub>2</sub>–2D1D stretchable nanocomposite was used as an example.  $\epsilon_{5\%}$  represents the uniaxial elongation that increases the initial resistance ( $R_0$ ) by 5%.  $\epsilon_{7.5\%}$  represents the uniaxial elongation that increases  $R_0$  by 7.5%.  $\epsilon_{10\%}$  represents the uniaxial elongation that increases  $R_0$  by 10%.

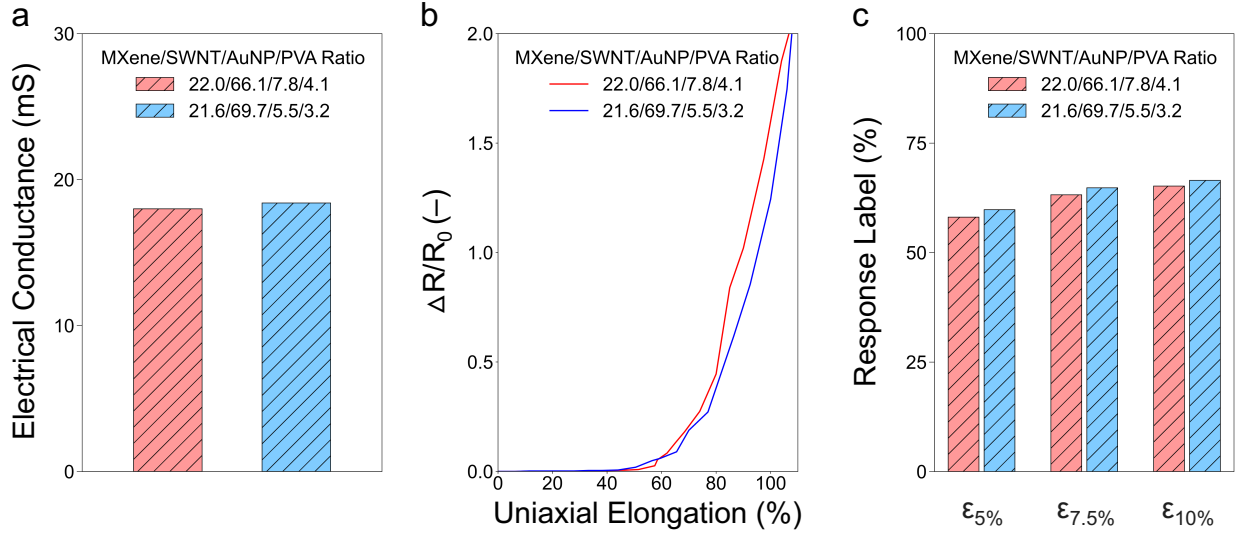

**Fig. S9. Performance of  $G_1/G_2$  stretchable nanocomposites upon slight composition variations.** With slight variations in the MXene/SWNT/AuNP/PVA ratio (22.0/66.1/7.8/4.1 vs. 21.6/69.7/5.5/3.2), two  $G_1$ -2D stretchable nanocomposites were fabricated and demonstrated similar (a) electrical conductance values (i.e.,  $S_0$ ), (b) resistance-elongation curves, and (c) response labels (i.e.,  $\epsilon_{5\%}$ ,  $\epsilon_{7.5\%}$ ,  $\epsilon_{10\%}$ ).

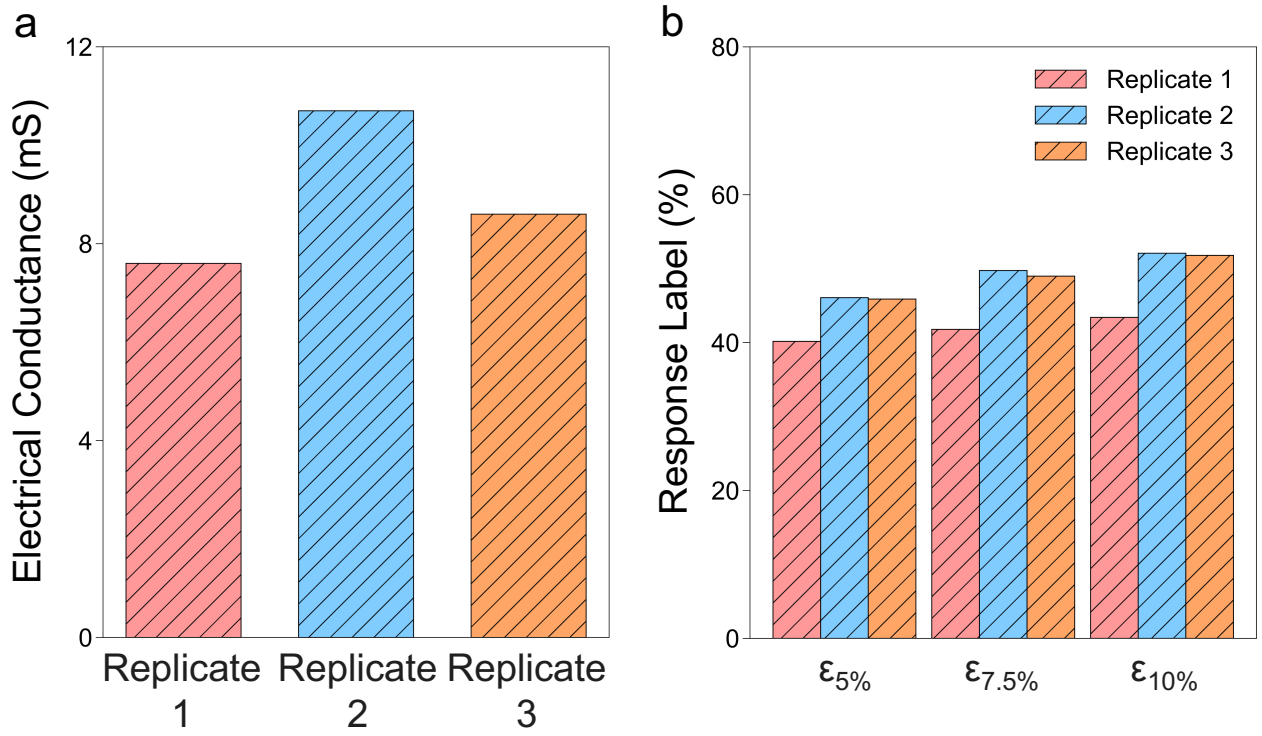

**Fig. S10. Measurement variations across G<sub>1</sub>/G<sub>2</sub> stretchable nanocomposite replicates.** A set of fabrication parameters was used to prepare three G<sub>1</sub>-2D replicates, including the MXene/SWNT/AuNP/PVA ratio of 45/45/8/2, the nanocomposite thickness of 1,200 nm, and the deformation sequence of G<sub>1</sub>-2D. **(a)** Electrical labels (i.e.,  $S_0$ ) of three G<sub>1</sub>-2D replicates. **(b)** Response labels (i.e.,  $\epsilon_{5\%}$ ,  $\epsilon_{7.5\%}$ ,  $\epsilon_{10\%}$ ) of three G<sub>1</sub>-2D replicates.

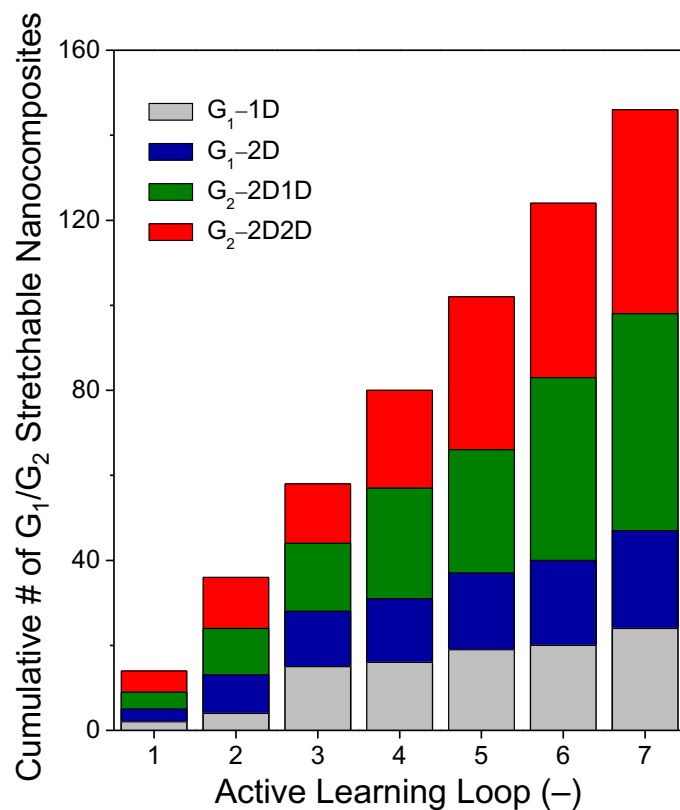

**Fig. S11. Cumulative numbers of G<sub>1</sub>/G<sub>2</sub> stretchable nanocomposites fabricated across active learning loops.** 146 G<sub>1</sub>/G<sub>2</sub> stretchable nanocomposites were fabricated across 7 active learning loops, including 24 G<sub>1</sub>-1D, 23 G<sub>1</sub>-2D, 51 G<sub>2</sub>-2D1D, and 48 G<sub>2</sub>-2D2D stretchable nanocomposites.

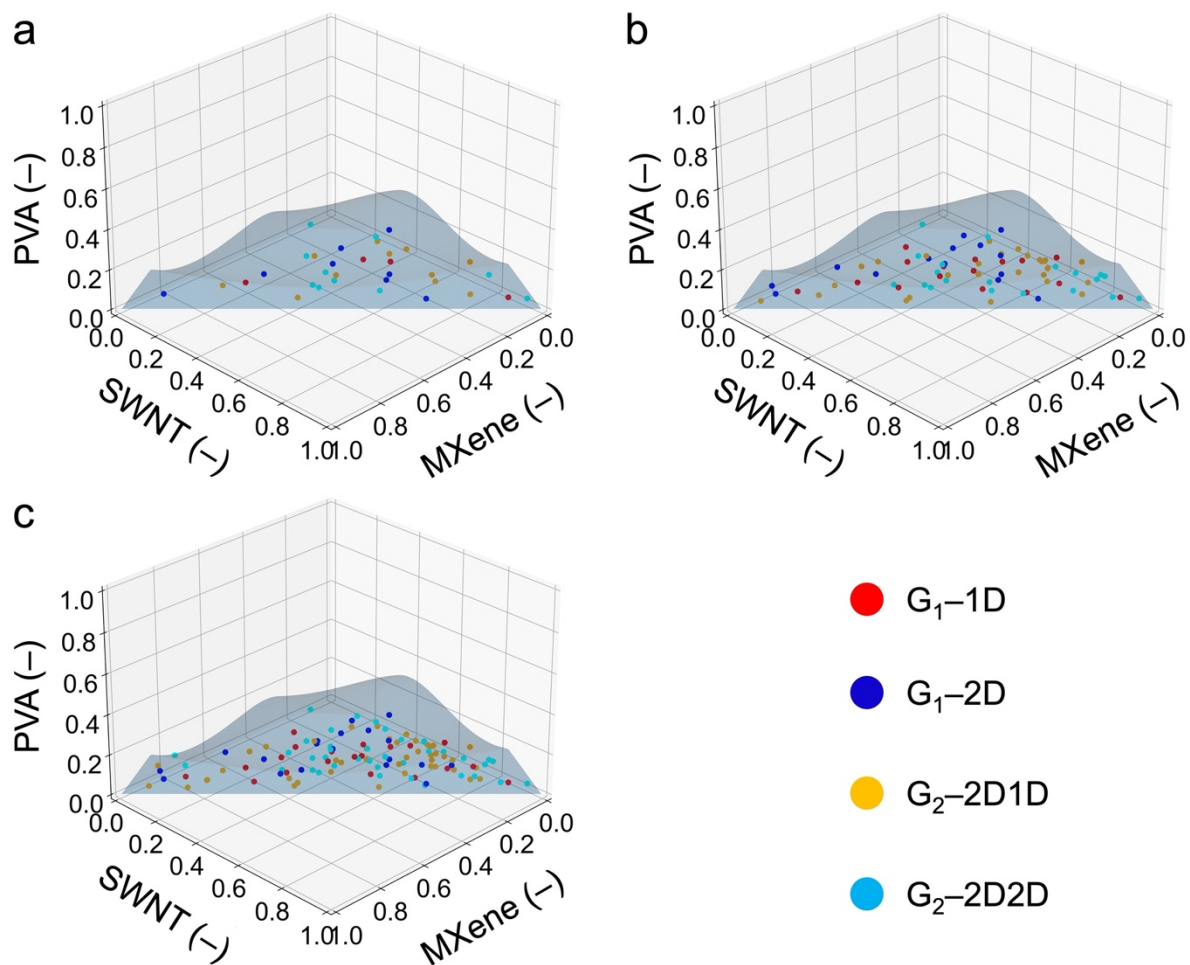

**Fig. S12. Spatial distributions of  $G_1/G_2$  stretchable nanocomposites in the feasible parameter space. (a) After 2 loops. (b) After 4 loops. (c) After 6 loops.**

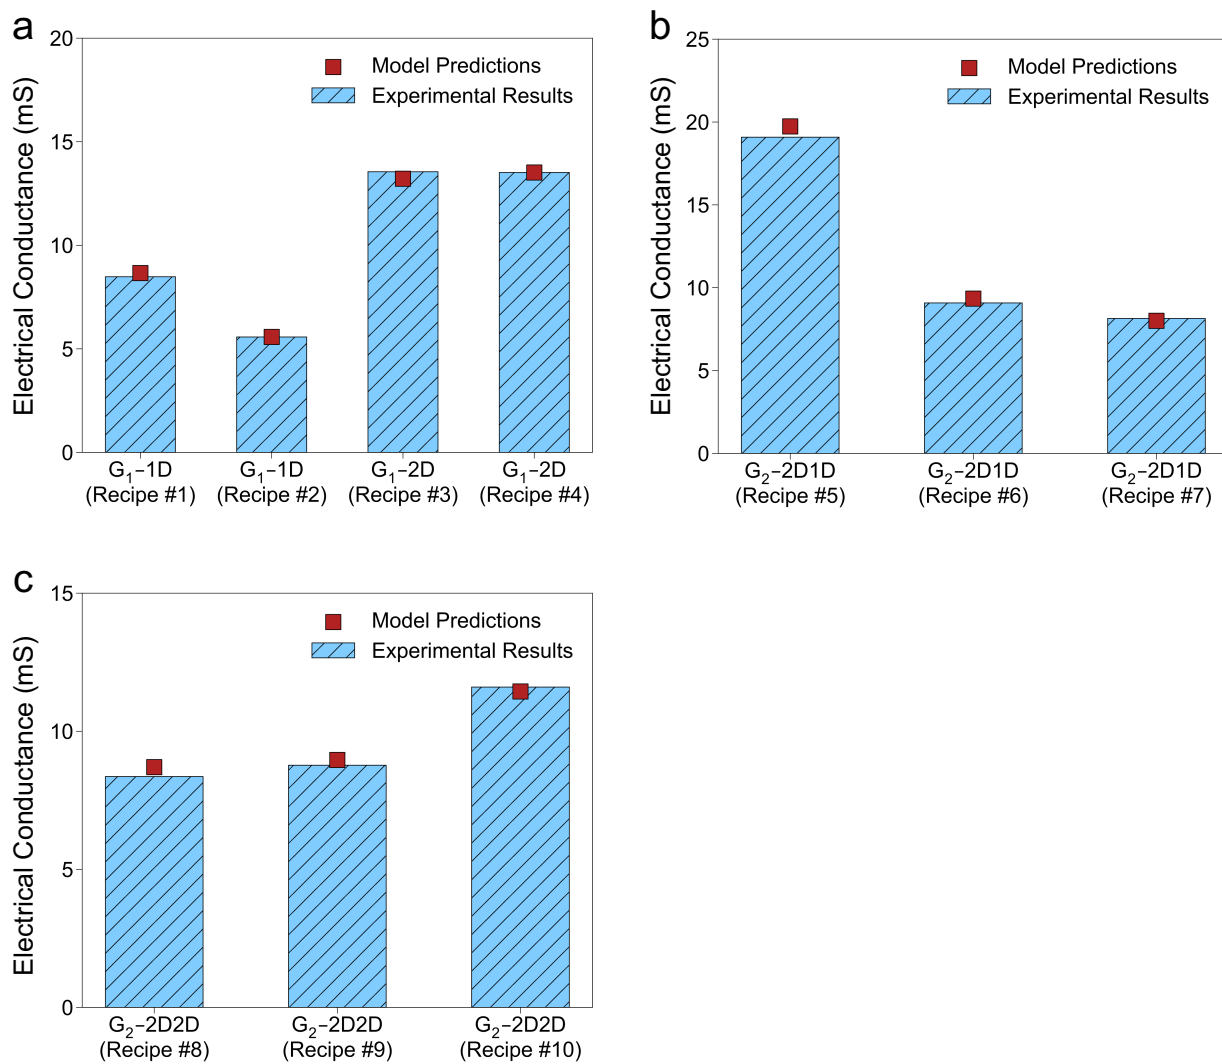

**Fig. S13. Comparison between model-predicted and actual electrical conductance. (a)** G<sub>1</sub>-1D and G<sub>1</sub>-2D stretchable nanocomposites. **(b)** G<sub>2</sub>-2D1D stretchable nanocomposites. **(c)** G<sub>2</sub>-2D2D stretchable nanocomposites.

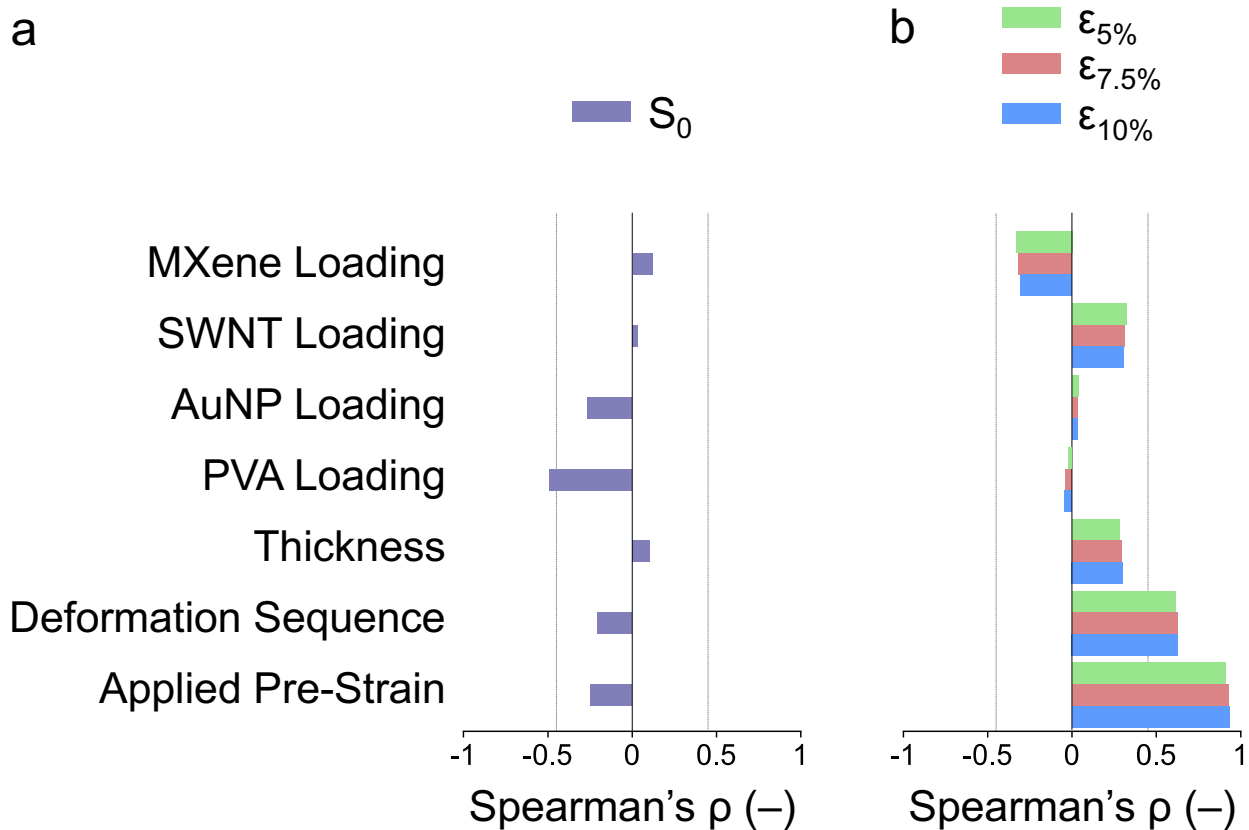

**Fig. S14. Statistical analyses between fabrication parameters and nanocomposite properties.**

Spearman's  $\rho$  of MXene loading, SWNT loading, AuNP loading, and PVA loading, nanocomposite thickness, deformation sequence, and applied pre-strain on (a) the electrical label (i.e.,  $S_0$ ) and (b) the response labels (i.e.,  $\epsilon_{5\%}$ ,  $\epsilon_{7.5\%}$ ,  $\epsilon_{10\%}$ ). **Fig. S14a** shows that the PVA loading was negatively correlated with  $S_0$ . **Fig. S14b** shows that the deformation sequence and applied pre-strain were positively correlated with three response labels.

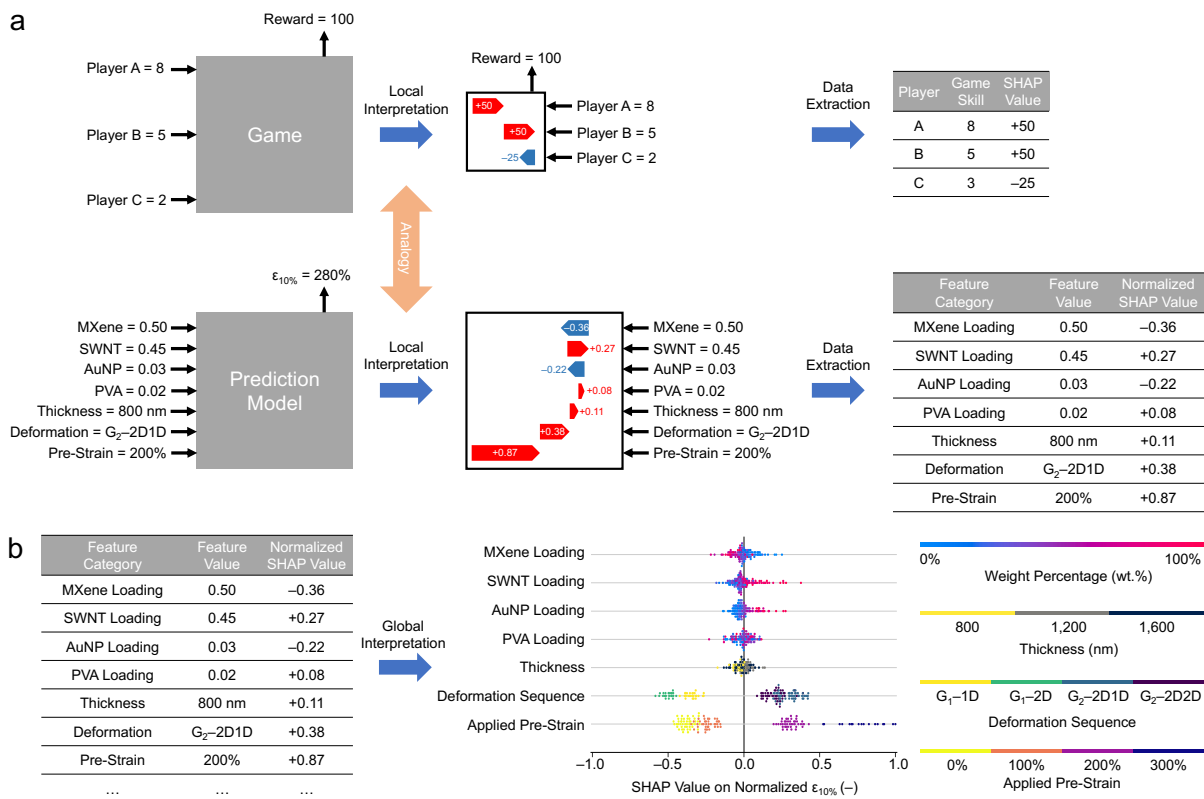

**Fig. S15. Working mechanism of SHAP model interpretation.** (a) An analogy between the interpretation of a specific game and the interpretation of a prediction model. The blue and red bars are the SHAP values (positive as red and negative as blue). (b) Figure plotting to get the global interpretation of the prediction model by using the SHAP values of every feature for every data point.



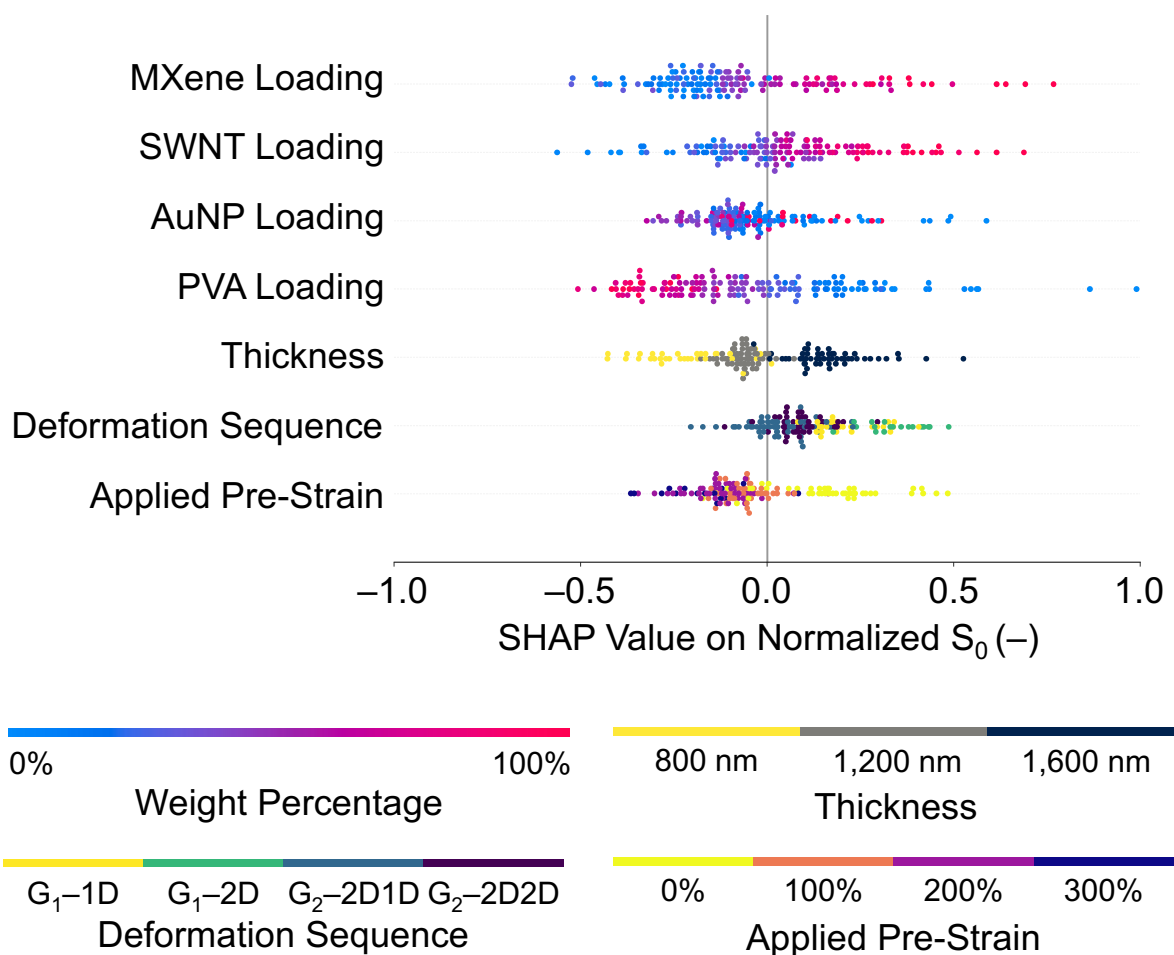

**Fig. S16. SHAP interpretation on the  $S_0$  of  $G_1/G_2$  stretchable nanocomposites.** Normalized SHAP values of MXene loading, SWNT loading, AuNP loading, PVA loading, nanocomposite thickness, deformation sequence, and applied pre-strain on the  $S_0$  of  $G_1/G_2$  stretchable nanocomposites.

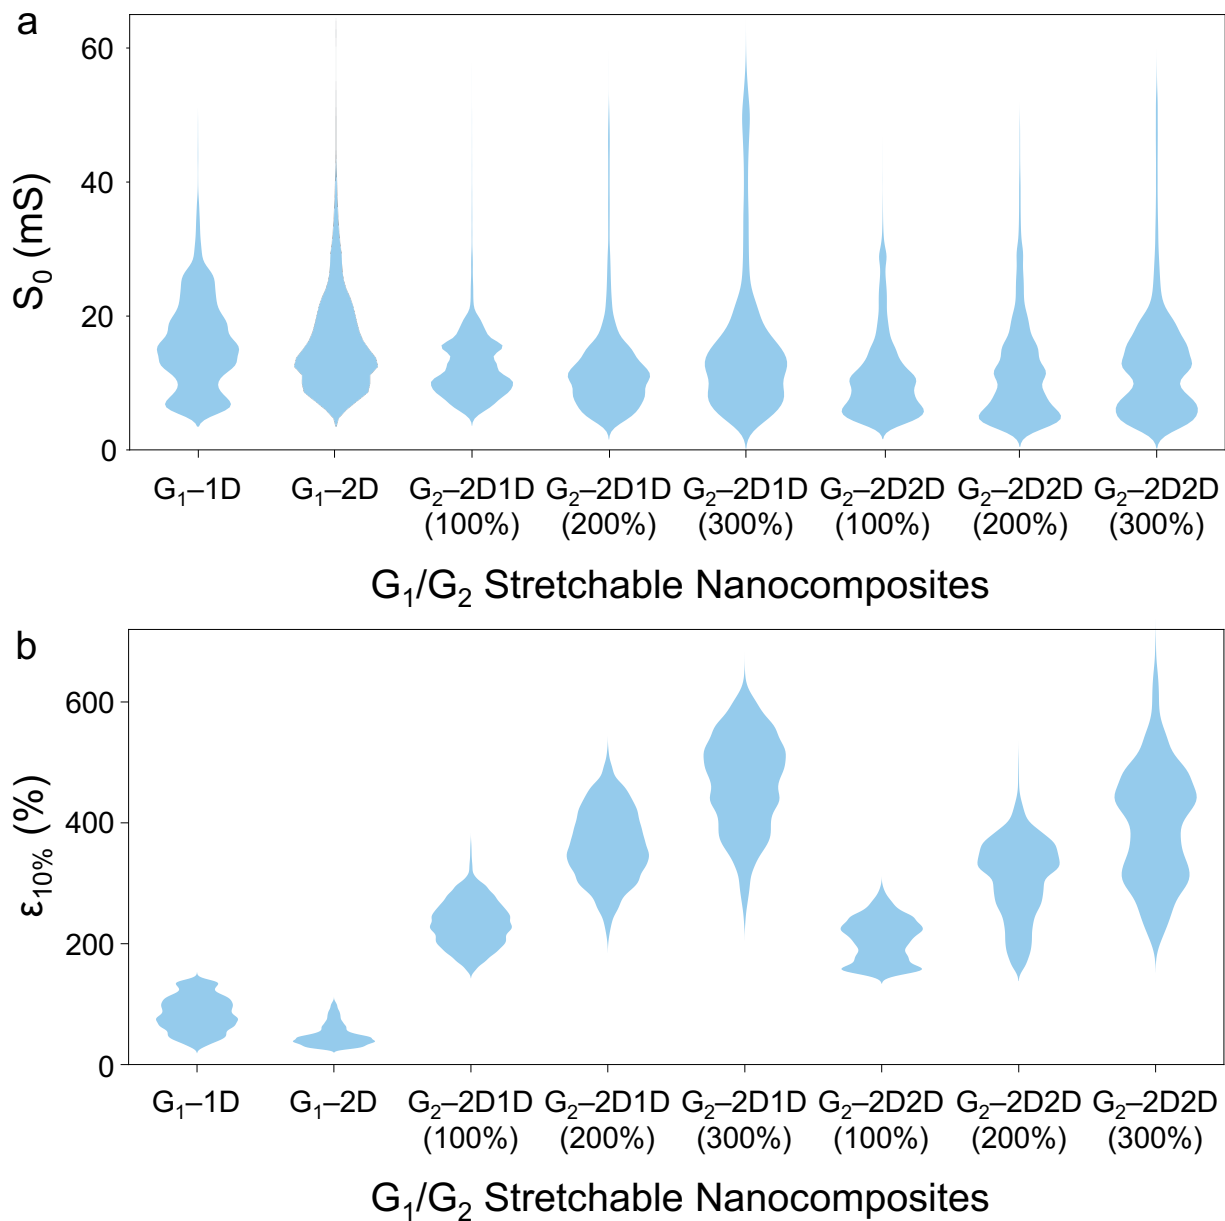

**Fig. S17. Violin plots of  $G_1/G_2$  stretchable nanocomposites.** (a) The electrical label (i.e.,  $S_0$ ) was less responsive to the deformation sequence and applied pre-strain during the fabrication of  $G_1/G_2$  stretchable nanocomposites. (b) The response labels (e.g.,  $\epsilon_{10\%}$ ) was highly responsive to the deformation sequence and applied pre-strain during the fabrication of  $G_1/G_2$  stretchable nanocomposites.

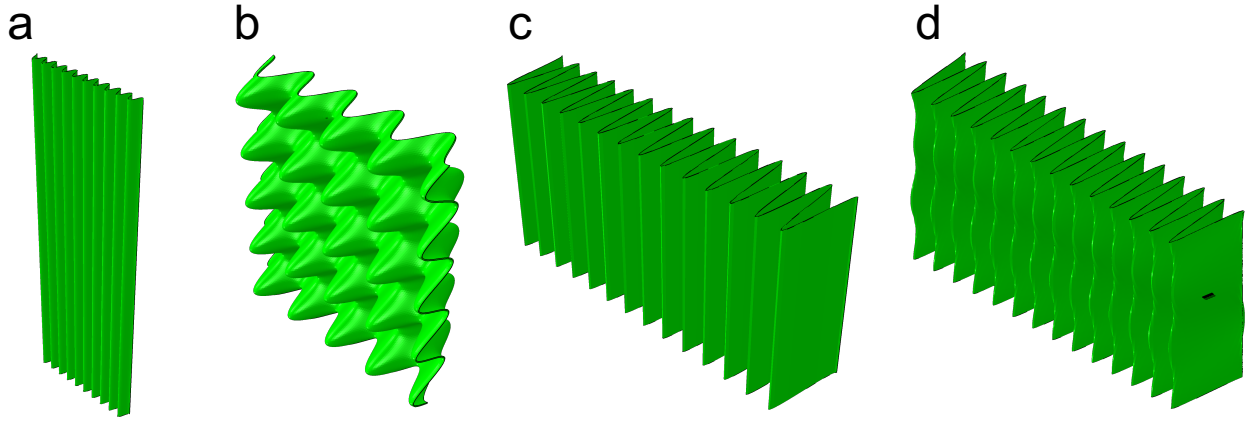

**Fig. S18. Two-scale FE models of  $G_1/G_2$  stretchable nanocomposites.** (a) FE model of a  $G_1$ -2D stretchable nanocomposite. The checkerboard mode was utilized to describe the isotropic crumples. (b) FE model of a  $G_2$ -2D1D stretchable nanocomposite. (c) FE model of a  $G_2$ -2D1D stretchable nanocomposite. On the small scale, the checkerboard mode was utilized to describe the isotropic crumples. At the large scale, cylindrical (wavy) mode was utilized to depict the parallel wrinkles. (d) FE model of a  $G_2$ -2D2D stretchable nanocomposite. On the small scale, the checkerboard mode was utilized to describe the isotropic crumples. At the large scale, undulating (*S*-shape) mode was utilized to depict the curvy wrinkles.

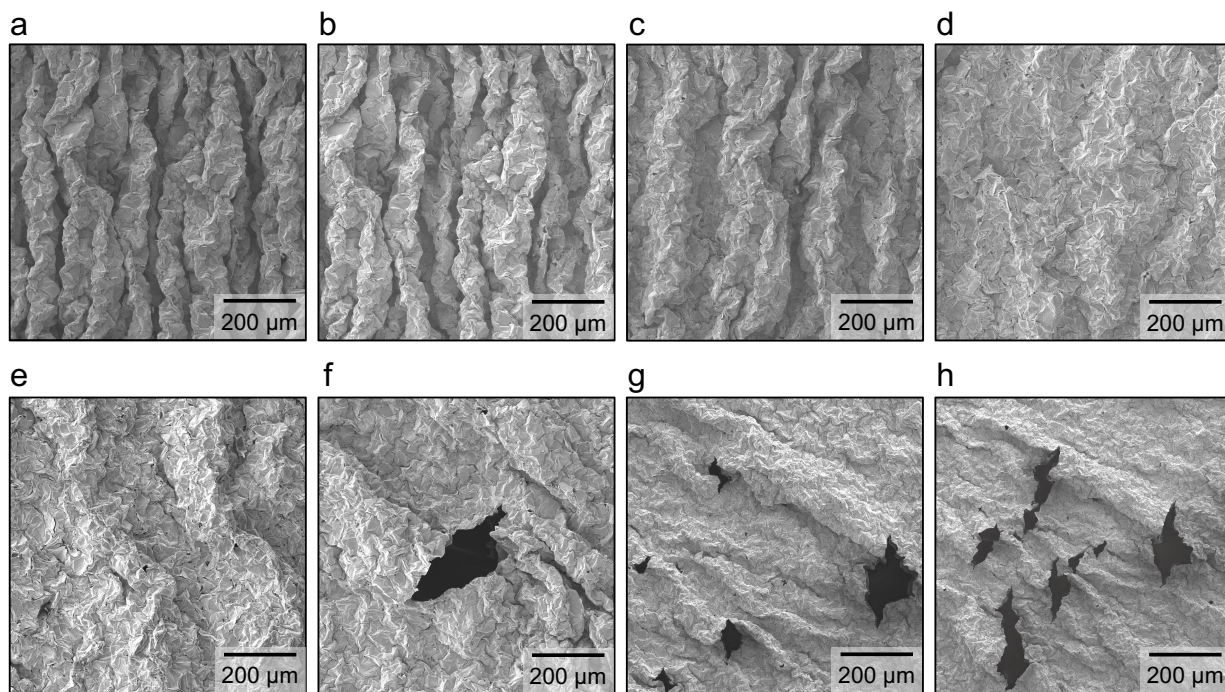

**Fig. S19. SEM images of a G<sub>2</sub>-2D2D gold conductor during a continuous elongation loading process from 0% to 1,300%. (a) 100%. (b) 200%. (c) 400%. (d) 600%. (e) 800%. (f) 1,000%. (g) 1,200%. (h) 1,300%.**

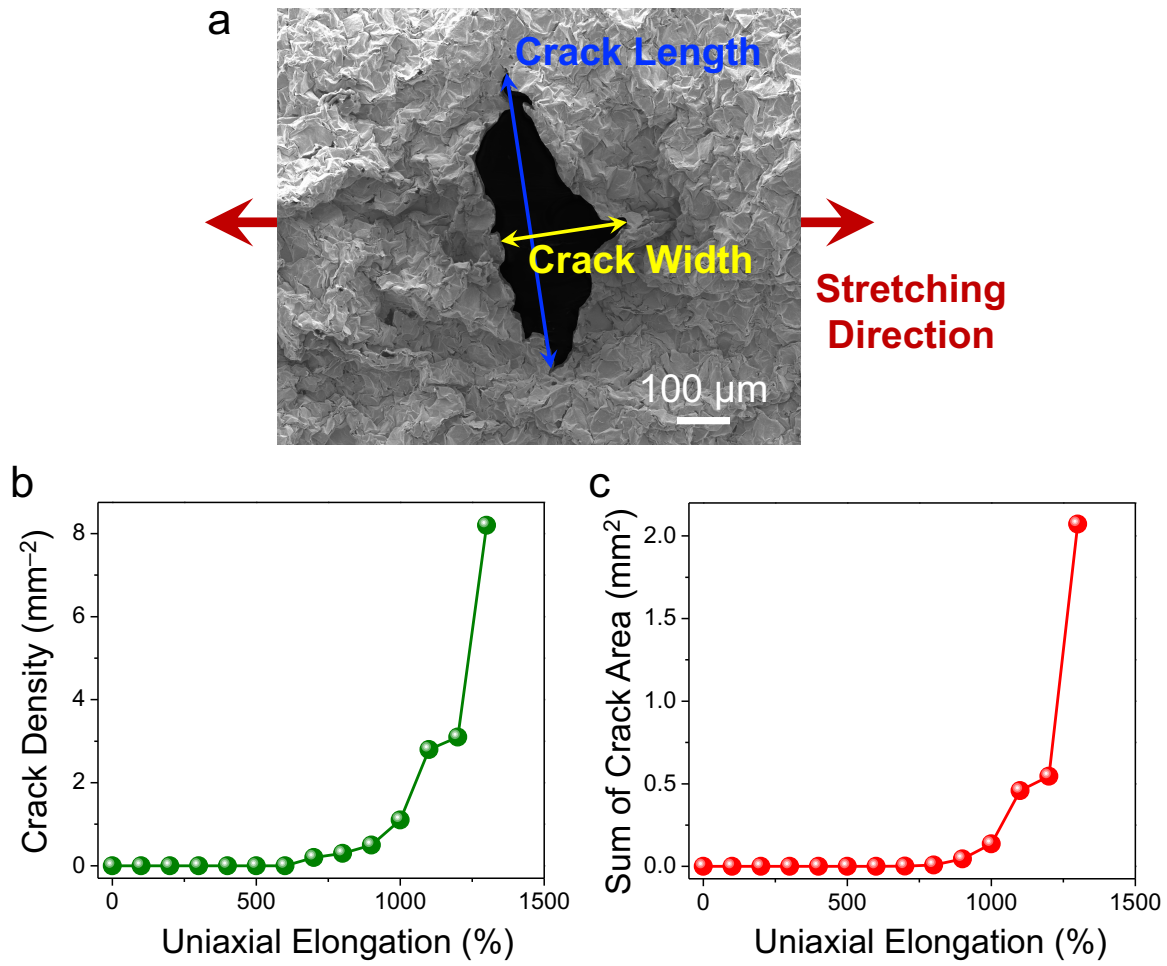

**Fig. S20. Crack density and area measurement of a G<sub>2</sub>-2D2D stretchable gold conductor.** (a) The SEM image of a G<sub>2</sub>-2D2D stretchable gold conductor under 800% elongation. Crack length ( $L_1$ ) is defined as the distance between the two furthest points along the perimeter of the crack. Crack width ( $L_2$ ) is defined as the furthest distance of the crack perpendicular to  $L_1$ . (b) Crack densities under different elongations. (c) Sum of crack areas under different elongations.

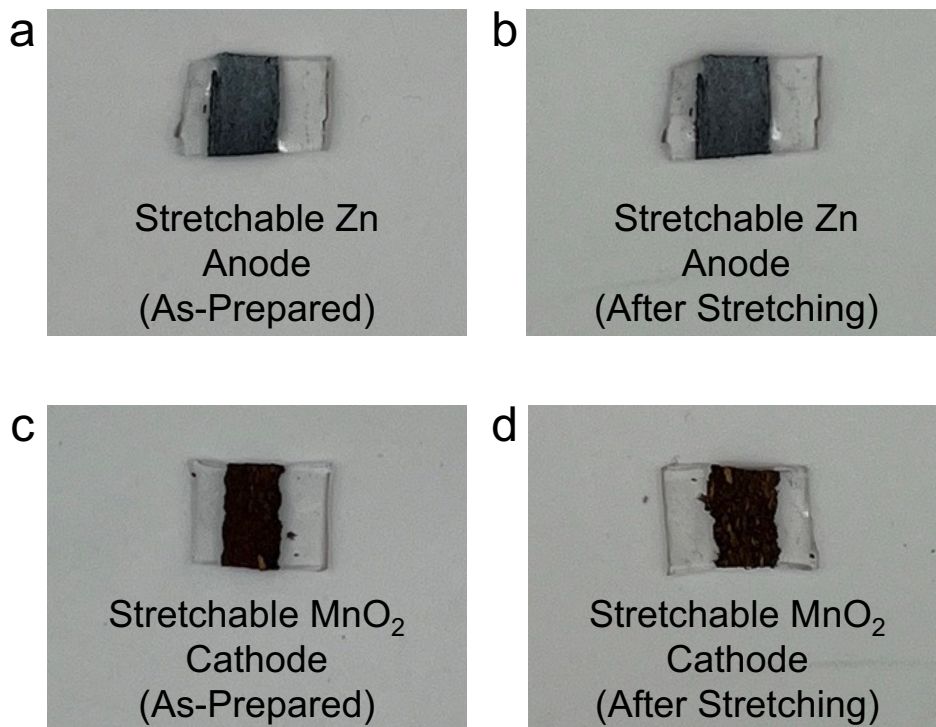

**Fig. S21. Photographs of stretchable Zn and MnO<sub>2</sub> electrodes.** (a) As-prepared stretchable Zn anode. (b) Stretchable Zn anode after 3,000 stretching–relaxation cycles. (c) As-prepared MnO<sub>2</sub> cathode. (d) Stretchable MnO<sub>2</sub> cathode after 3,000 stretching–relaxation cycles.

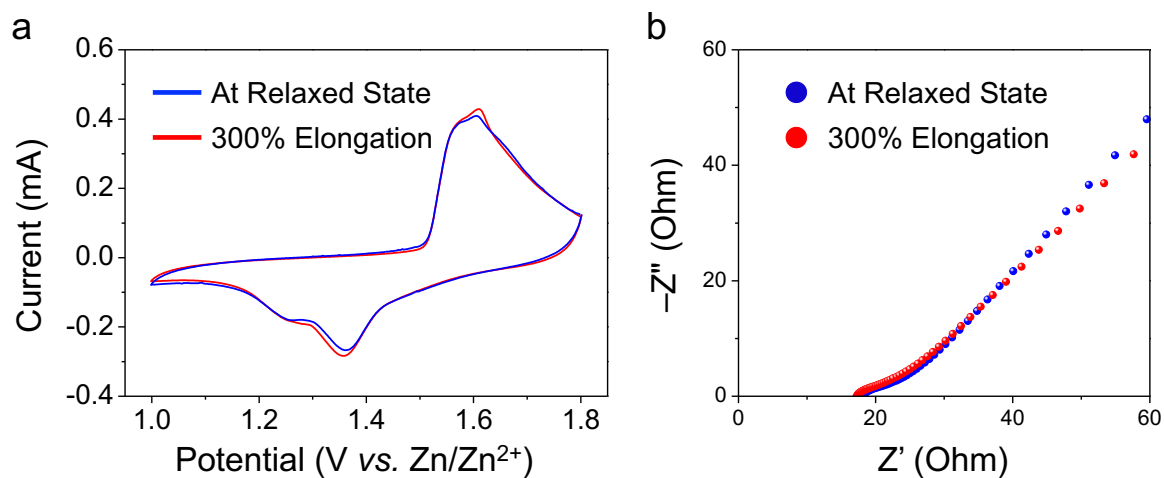

**Fig. S22. Electrochemical characterizations of a stretchable Zn//MnO<sub>2</sub> battery at its relaxed state and under 300% elongation. (a) CV curves at 1 mV s<sup>-1</sup>. (b) Nyquist plots.**

**Note S1. Rationale of building block selection and model expansion strategy for  $G_1/G_2$  stretchable nanocomposites.**

In this work, four building blocks were selected to fabricate  $G_1/G_2$  stretchable nanocomposites with high electrical conductance and insensitive strain responses. Four building blocks include three electrically conductive nanomaterials, including  $Ti_3C_2T_x$  MXene nanosheets, SWNTs, and AuNPs, and polyvinyl alcohol (PVA). First,  $Ti_3C_2T_x$  MXene nanosheets, an emerging class of two-dimensional (2D) transition metal carbides, present superior electrical conductivity, intrinsic hydrophilicity, and high aspect ratios<sup>1</sup>. Second, SWNTs, a class of one-dimensional (1D) materials made of a single rolled graphene sheet with a cylindrical nanostructure, demonstrate high tensile strength and superior electrical conductivity<sup>2</sup>. Third, AuNPs, a class of zero-dimensional (0D) materials with an average diameter of 20 nm, can be integrated with the 2D/1D building blocks, which facilitate nanoscale contacts and boost overall electrical conductivity<sup>3</sup>. Last, PVA, as a polymeric binder, is introduced to enhance the structural stability of  $G_1/G_2$  stretchable nanocomposites.

To augment the model's predictive power, we can adopt a model expansion method to incorporate more building blocks into  $G_1/G_2$  stretchable nanocomposites. As shown in **Fig. S1**, additional active learning loops can be performed under the guidance of the prediction model. During the model expansion phase, additional experiments are required to refine the SVM classifier and to update the ANN-based model. By strategically selecting new components in tandem with the model expansion method, the prediction model can consistently enlarge its parameter space and broaden the range of achievable functions. However, this model expansion incurs additional active learning cycles, leading to higher time and cost implications.



**Note S2. Tunable wavelengths of G<sub>2</sub>-2D1D and G<sub>2</sub>-2D2D stretchable nanocomposites.**

As shown in **Fig. S4a-c**, the average wavelengths of G<sub>2</sub>-2D1D stretchable nanocomposites were tuned from 90 to 48  $\mu\text{m}$  by adjusting the applied pre-strains of VHB substrates from 100% to 300%, respectively. As shown in **Fig. S4d-f**, the average wavelengths of G<sub>2</sub>-2D2D stretchable nanocomposites were tuned from 162 to 67  $\mu\text{m}$ , by adjusting the applied pre-strains of VHB substrates from 100% to 300%, respectively.

**Note S3. Estimated number of experiments required to build an extensive dataset for  $G_1/G_2$  stretchable nanocomposites.**

Three degrees of freedom (DOFs) were recognized in the compositions of  $G_0$  nanocomposites, including MXene loading, SWNT loading, and AuNP loading. Once these three loadings were fixed, the PVA loading was automatically determined. If we set 2.0 wt.% as the step size, the total steps to vary the MXene/SWNT/AuNP/PVA ratio were calculated to be ~23,500. Additionally, the nanocomposites thicknesses, deformation sequences, and applied pre-strain were three other DOFs for the fabrication of  $G_1/G_2$  stretchable nanocomposites. In this work, three thicknesses of  $G_0$  nanocomposites were adopted, including 800 nm, 1,200 nm, and 1,600 nm, and four kinds of deformation sequences were included, containing  $G_1$ -1D,  $G_1$ -2D,  $G_2$ -2D1D, and  $G_2$ -2D2D. There were three choices of applied pre-strains during the fabrication of  $G_2$ -2D1D and  $G_2$ -2D2D stretchable nanocomposites, including 100%, 200%, and 300%. In total, building an extensive dataset for  $G_1/G_2$  stretchable nanocomposites will require ~562,000 experiments if we follow conventional one-factor-at-a-time (OFAT) design of experiment method. For each  $G_1$  or  $G_2$  stretchable nanocomposite, one “electrical” label ( $S_0$ ) and three “response” labels ( $\varepsilon_{5\%}$ ,  $\varepsilon_{7.5\%}$ ,  $\varepsilon_{10\%}$ ) were needed to be collected. The calculation was conducted using a customized Python program:

[https://github.com/yhcbloom14/stretchable\\_conductor/blob/main/number\\_of\\_experiments\\_for\\_design\\_of\\_experiment.ipynb](https://github.com/yhcbloom14/stretchable_conductor/blob/main/number_of_experiments_for_design_of_experiment.ipynb).

#### **Note S4. Necessity of multistage ML framework.**

To demonstrate the necessity of each unit used in the multistage ML framework, justifications are provided as follows to explain why they are superior to other standard methods.

SVM regression model. The SVM regression model served as a critical screening layer in the active learning loops, which drove the prediction model to only recommend the MXene/SWNT/AuNP/PVA ratios that led to the  $G_0$  nanocomposites with high electrical conductance values  $>6.67$  mS. Unlike other data-rich systems with higher tolerance of experiment failure, it would take much time and effort to redo the fabrication of  $G_0$  nanocomposites, if the prediction model suggests the MXene/SWNT/AuNP/PVA ratios that lead to the  $G_0$  nanocomposites with low electrical conductance.

Active learning loops with ensemble modeling. According to **Fig. 3c**, the prediction model (consisting of an ensemble committee with multiple ANNs) demonstrated a low MRE of 13.5% after 7 active learning loops, which accurately predicted the “electrical” and “response” labels of  $G_1/G_2$  stretchable nanocomposites from their fabrication parameters. In comparison, the prediction models based on other algorithms presented higher MREs and were not able to accurately predict the “electrical” and “response” labels, clearly demonstrating the necessity of ANN-based ensemble modeling for such a non-linear and multi-DOF system.

Data augmentation. Data augmentation was conducted to address the major challenges of data scarcity and model overfitting. In this work, the User Input Principle (UIP) method was adopted to synthesize virtual data points, and both real and virtual data points were input to train a prediction model. As shown in **Fig. 3d**, after the UIP method, the model’s prediction accuracy was largely improved, and the MREs decreased from 30.6% to 13.5%.

Overall, we believe that the multistage ML framework composed of SVM regression model, active learning loops with ensemble modeling, and data augmentation can synergistically improve the accuracy of a prediction model. In contrast, a simple or single ML tool/method could not achieve such model accuracy based on a small dataset.

### **Note S5. Training of a support vector machine (SVM) regression model.**

To ensure the prediction model to suggest the MXene/SWNT/AuNP/PVA ratio that resulted in the fabrication of a  $G_0$  nanocomposite with high electrical conductance ( $>6.67$  mS), a SVM regression model was constructed. The SVM regression model predicted the electrical conductance of a  $G_0$  nanocomposite from its MXene/SWNT/AuNP/PVA ratio.

To construct a SVM regression model, four steps were involved: (1) take the logarithmic term of the electrical conductance, (2) select a kernel function, (3) optimize SVM hyperparameters, and (4) train a SVM model using the training data points. For the first step, as the electrical conductance values ranged widely from 0 to  $+\infty$ , which was ineffective in training an accurate SVM regression model. Therefore, we calculated the logarithmic conductance value using **Equation S1**,

$$\text{Logarithmic conductance (LC)} = 1/\log_{10}(S_0^{-1} + 10) \quad (\text{S1})$$

, where  $S_0$  is the electrical conductance of a  $G_0$  nanocomposite, and the LC values range from 0 to +1. For the second step, as the LC values were shown to be non-linear, we decided to select a radial basis function (RBF) as the kernel function to map low-dimension data points into a higher dimensional feature space to find the optimal hyperplanes with maximal margin distances<sup>4</sup>. For the third step, Bayesian optimization (involving Gaussian processes and a 5-fold cross validation) was used to adjust the hyperparameter values<sup>5</sup>. For the fourth step, the SVM regression model was trained by inputting 286 data points (**Table S2**). Finally, the SVM regression model demonstrated a low mean relative error (MRE) of  $\sim 17\%$  to predict the LC values of  $G_0$  nanocomposites using 42 testing data points (which were never input into the model training phase, **Table S4**). After setting the electrical conductance threshold of  $>6.67$  mS, a feasible parameter space was defined

in **Fig. S7**. The SVM regression model was able to suggest the MXene/SWNT/AuNP/PVA ratios that were positioned in the feasible parameter space at high accuracy of 95%.

The open-source code to train the SVM regression model in Python is provided in GitHub:

[https://github.com/yhcbloom14/stretchable\\_conductor/blob/main/design\\_boundary.ipynb](https://github.com/yhcbloom14/stretchable_conductor/blob/main/design_boundary.ipynb).

#### **Note S6. User Input Principle (UIP) method for data augmentation.**

To address model overfitting challenges upon the use of a small dataset, the data points collected during active learning were augmented using the UIP method. The UIP method is based on the natural principles proposed by expert users. For example, over small variations across specific “composition” label(s), the “electrical” and “response” labels of a stretchable nanocomposite remained approximately the same. As shown in **Fig. S9**, when the MXene/SWNT/AuNP/PVA ratios varied from 22.0/65.2/7.8/5.0 to 21.6/69.7/5.5/3.2, the resulting G<sub>1</sub>–2D stretchable nanocomposites exhibited similar “electrical” and “response” labels. Also, measurement variations existed in the “electrical” and “response” labels. As shown in **Fig. S10**, by following the same set of fabrication parameters, the characterized the “electrical” and “response” labels had 10–20% measurement variations among multiple replicates. In this work, based on 146 data points collected during active learning, we used the UIP method to synthesize 1,000-fold virtual data points by introducing Gaussian noises into all “composition”, “electrical”, and “response” labels.

The open-source code to implement the UIP method in Python is provided in GitHub: [https://github.com/yhcbloom14/stretchable\\_conductor/blob/main/data\\_augmentation.ipynb](https://github.com/yhcbloom14/stretchable_conductor/blob/main/data_augmentation.ipynb).

**Note S7. Calculation of *A Score* acquisition function.**

In the active learning loops, an acquisition function was introduced to suggest the targeted data points with the highest uncertainty in the feasible parameter space. We defined the acquisition function as *A Score* (**Equation S2**),

$$A\ Score = \min(\hat{L}_1, \hat{L}_2) \cdot \hat{\sigma} \quad (S2)$$

, where  $\hat{L}_1$  denotes the shortest Euclidian distance between current input labels (within the dataset of prediction model) and targeted input labels (not yet included in the dataset of prediction model), and  $\hat{L}_2$  denotes the shortest Euclidian distance between each targeted input label. Input labels include MXene loading, SWNT loading, AuNP loading, PVA loading, nanocomposite thickness, deformation sequence, and applied pre-strain.  $\hat{L}_1$  and  $\hat{L}_2$  are calculated by **Equation S3,4**, respectively,

$$\hat{L}_1 = \min_{\substack{i \in N \\ j \in M}} (||Input_i - Input_j||) \quad (S3)$$

$$\hat{L}_2 = \min_{\substack{j \in M \\ k \in M}} (||Input_j - Input_{k \neq j}||) \quad (S4)$$

, where  $N$  is the cumulative number of data points in the current dataset, and  $M$  is the cumulative number of data points in the targeted dataset. One-hot encoding was used for the input label of deformation sequence in the prediction model. On the other hand,  $\hat{\sigma}$  denotes the prediction variance of “electrical” and “response” labels from the ensemble committee of ANNs, which is defined in **Equation S5**,

$$\hat{\sigma} = \sum_{i=1}^M \sum_{p=1}^C [(Output_{p,i}) - (Output_{average,i})]^2 \quad (S5)$$

, where  $M$  is the cumulative number of data points in the target dataset,  $C$  is the total number of ANNs in the ensemble committee ( $C = 5$ ),  $Output_{p,i}$  is the output labels predicted by the  $p^{\text{th}}$



decision program on basis of the input labels of a targeted data point,  $Output_{average,i}$  is the average output labels predicted by the ANN committee on basis of the input labels of a targeted data point.

The open-source code to implement *A Score*-based active learning loops in Python is provided in GitHub:

[https://github.com/yhcbloom14/stretchable\\_conductor/blob/main/active\\_learning.ipynb](https://github.com/yhcbloom14/stretchable_conductor/blob/main/active_learning.ipynb).

### **Note S8. SHAP model interpretation.**

The SHAP model interpretation is a game theoretic approach to explain the output of any ML model (including any ensemble models). The SHAP model interpretation can find the feature importance inside a ML model, enabling the users to address the black-box challenges of AI/ML predictions. The analytical process of SHAP model interpretation is like investigating the contribution of each player in a collaborative game. To understand how the feature importance is derived in the SHAP analysis, an example is presented below.

As shown in **Fig. S15a**, there are three players, *A*, *B*, and *C*. They collaborate with each other to play a game. When all of them join the game, based on their different skills in a specific game, they can collectively achieve a 100 reward. The task is to quantify how important each player is in getting the reward. To solve this, we assume that three players join the game in a specific sequence (e.g., player *A* first, then player *B*, next player *C*), and the marginal reward of each player is then recorded. For example, player *A* is the first member with a reward of 50, then player *B* joins the game and brings the reward to 90, and next player *C* joins the game to bring the reward to 100. Therefore, the players' respective marginal rewards are "players *A*, *B*, *C* = 50, 40, 10". However, the calculated marginal reward may not accurately represent the contribution of each player. For example, when the sequence is changed from players *A*, *B*, *C* to players *A*, *C*, *B*, the rewards are still 50, 40, and 10, indicating that players *B* and *C* have a similar skill set. Then, the players' respective marginal rewards are changed to "player *A*, *B*, *C* = 50, 10, 40". Therefore, the sequence of how the players join the game is important.

To get a more accurate reward of each individual player, we need to find out the marginal reward of each player under every possible sequence. The reward for each individual player then can be the sum of these marginal rewards over the number of possible sequences (the calculation

for a specific player is illustrated in **Equation S6**). For example, in the case outlined above, we can simulate the arrival sequences:  $ABC$ ,  $ACB$ ,  $BCA$ ,  $BAC$ ,  $CAB$ , and  $CBA$ , and the marginal reward of each player is recorded for each sequence. Then, by averaging all these rewards, we obtain the reward contributed from each player. This reward is the SHAP value,

$$\text{SHAP value of a specific player} = \frac{\sum_N \text{marginal reward of the player}}{N} \quad (\text{S6})$$

, where  $N$  represents number of total possible sequences.

In contrast to the feature importance analysis of a prediction model, we can take the problem as an analogy to the above case. All “composition” (MXene loading, SWNT loading, AuNP loading, and PVA loading), “thickness”, “deformation”, and “strain” labels are regarded as players, which are fed into the prediction model to obtain the “conductance” and “response” labels. The prediction process is treated as the game, and the deviation (between the predicted “electrical” and “response” label of a specific data point and the average “electrical” and “response” labels from all data points) is treated as the reward. By following **Equation S7**, the SHAP value of each input label on a specific “electrical” or “response” label can be calculated, and this value is used to measure the feature importance.

$$\begin{aligned} &\text{SHAP value of an input label} \\ &= \frac{\sum_N \text{marginal reward of an input label on a specific output label}}{N} \end{aligned} \quad (\text{S7})$$

, where  $N$  represents number of total possible sequences. The above process is the interpretation of the prediction model on a specific data point which is called the local interpretation. To get the global interpretation of the prediction model over all data points, we can plot the SHAP values of every input label for every data point, as shown in **Fig. S15b**. A wider range of the SHAP value for a specific feature indicates a higher importance, and *vice versa*.

The open-source code to implement SHAP analyses in Python is provided in GitHub:

[https://github.com/yhcbloom14/stretchable\\_conductor/blob/main/shap\\_plotting.ipynb](https://github.com/yhcbloom14/stretchable_conductor/blob/main/shap_plotting.ipynb).

**Note S9. Two-scale finite element (FE) models of G<sub>1</sub>/G<sub>2</sub> stretchable nanocomposites.**

The complex topographies of G<sub>1</sub>/G<sub>2</sub> stretchable nanocomposites were first generated using different deflection functions. These deflection functions were determined by minimizing the total energy of the binary system (including a conductive nanocomposite and an elastomeric substrate) under varying compressive stresses, as formulated in **Equation S8**<sup>6</sup>,

$$\xi_t(\{u, v, w\}) = \xi_s(\{w\}) + \xi_{fb}(\{w\}) + \xi_{fs}(\{u, v, w\}) \quad (\text{S8})$$

, where  $\xi_t(\{u, v, w\})$  represents the total energy of a binary nanocomposite–substrate system,  $\xi_s(\{w\})$  is the energy of an elastomeric substrate,  $\xi_{fb}(\{w\})$  and  $\xi_{fs}(\{u, v, w\})$  are the energy of a conductive nanocomposite at the stretching and bending states, respectively. The total energy of a binary nanocomposite–substrate system,  $\xi_t(\{u, v, w\})$ , is a function of the in-plane displacements,  $u(x, y)$  and  $v(x, y)$  as well as the out-of-plane displacements,  $w(x, y)$ .

Audoly and Boudaoud has derived a general deflection function that can capture the four types of buckling modes<sup>6</sup>, including the cylindrical, undulating, varicose, and checkerboard modes, as described in **Equation S9**,

$$w(x, y) = A\cos(kx) + B\sin(kx)\sin(k'y) + C\cos(kx)\cos(k'y) + D\cos(k'y) \quad (\text{S9})$$

, where  $k$  is the wavenumber in the  $x$  direction (horizontal, in plane),  $k'$  is the wavenumber in the  $y$  direction (perpendicular to the  $x$  direction),  $A, B, C, D$  are the correlation parameters that tuned the amplitude(s) of a specific buckling mode. The relation between  $k$  and the wavelength ( $\lambda$ ) was correlated by **Equation S10**,

$$k = 2\pi/\lambda \quad (\text{S10})$$

, where  $\lambda$  is the wavelength of a G<sub>1</sub> or G<sub>2</sub> stretchable nanocomposite characterized from a Keyence laser confocal microscope. In this work,  $k'$  was assumed to be 1/10. **Table S8** summarizes the

correlation parameters selected to construct the FE models of G<sub>1</sub>–1D, G<sub>1</sub>–2D, G<sub>2</sub>–2D1D, G<sub>2</sub>–2D2D stretchable nanocomposites.

FE model of G<sub>1</sub>–1D stretchable nanocomposites. As shown in **Fig. S18a**, the post-buckled topography of a G<sub>1</sub>–1D stretchable nanocomposite was described as a cylindrical mode with a sinusoidal cross-section in an equilibrium state when subjected to uniaxial compression. To describe the wrinkle-like microtextures, a deflection function was derived in **Equation S11**,

$$w(x, y) = A \cos(kx) \quad (\text{S11})$$

FE model of G<sub>1</sub>–2D stretchable nanocomposites. As shown in **Fig. S18b**, the post-buckled topography of a G<sub>1</sub>–2D stretchable nanocomposite was described as a checkerboard mode in an equilibrium state when subjected to biaxial compression<sup>7,8</sup>. To describe the crumple-like microtextures, a deflection function was derived in **Equation S12**,

$$w(x, y) = A \cos(kx) + D \cos(k'y) \quad (\text{S12})$$

FE models of G<sub>2</sub>–2D1D and G<sub>2</sub>–2D2D stretchable nanocomposites. As shown in **Fig. S18c,d**, the hierarchical topographies of G<sub>2</sub>–2D1D and G<sub>2</sub>–2D2D stretchable nanocomposites arising from sequential deformations were described using a two-scale modeling approach. At the smaller scale, the crumple-like topography was described as a checkerboard mode, similar as the FE model of G<sub>1</sub>–2D stretchable nanocomposites. At the larger scale, the G<sub>2</sub>–2D1D stretchable nanocomposite exhibited straight strips and was simulated as a cylindrical mode with a sinusoidal cross-section, similar as the FE model of G<sub>1</sub>–1D stretchable nanocomposites. At the larger scale, the G<sub>2</sub>–2D2D

stretchable nanocomposites exhibited S-shaped strips and was simulated as an undulating mode, and a deflection function was derived in **Equation S13**,

$$w(x, y) = A\cos(kx) + b\sin(kx) \sin(k'y) \quad (\text{S13})$$

The complex surfaces of G<sub>1</sub>-1D, G<sub>1</sub>-2D, G<sub>2</sub>-2D1D, G<sub>2</sub>-2D2D stretchable nanocomposites were simulated, meshed, and exported to the STL files using MATLAB's `stlwrite` function<sup>9</sup> (<https://www.mathworks.com/matlabcentral/fileexchange/20922-stlwrite-write-ascii-or-binary-stl-files>). The STL files were then imported into Abaqus 2022/Standard FE solver, and the geometries were reconstructed using a plug-in tool developed by the SIMULIA Benelux office (<https://www.mathworks.com/matlabcentral/fileexchange/20922-stlwrite-write-ascii-or-binary-stl-files>).

Subsequently, a linear, elastic material model was introduced to all FE models with a Young's modulus of 1 GPa and a Poisson's ratio of 0.227<sup>10</sup>. These FE models aimed to simulate the deformation mechanisms of G<sub>1</sub>-1D, G<sub>1</sub>-2D, G<sub>2</sub>-2D1D, G<sub>2</sub>-2D2D stretchable nanocomposites. The modeling accuracy was maintained with 238,287 elements for the G<sub>1</sub>-1D stretchable nanocomposites, 244,216 elements for the G<sub>1</sub>-2D stretchable nanocomposites, 591,893 elements for the G<sub>2</sub>-2D1D stretchable nanocomposites, and 566,176 elements for the G<sub>2</sub>-2D2D stretchable nanocomposites, utilizing 4-node linear tetrahedron elements.

### Note S10. Clustering analysis.

In this work, we use the DBSCAN algorithm to search the clusters with both high  $S_0$  and  $\varepsilon_{10\%}$  values in the feasible parameter space. The acronym stands for “**Density-based Spatial Clustering of Applications with Noise**”<sup>11</sup>. The central component to the DBSCAN algorithm is the concept of “*core samples*”, which are the samples in the high-density areas. There are two crucial parameters to the DBSCAN algorithm, (1) *min\_samples* and (2) *eps*. Higher *min\_samples* or lower *eps* indicate higher density necessary to form a cluster. In this work, we set the *min\_samples* and *eps* values to be 70 and 0.05, respectively. The *eps* parameter was chosen appropriately, which was used to control the local neighborhood of the data points. When *eps* was chosen to be too small, most data points would not be clustered at all. When *eps* was chosen to be too large, it caused close clusters to be merged into one cluster, and eventually the entire data set to be returned as a single cluster. It should be noted that, before the model was employed to identify any champion samples through clustering analysis, the MRE value (using an independent testing data points) needed to be sufficiently low. Afterward, a certain amount of experimental validation can be conducted near the model-suggested clusters with global maximum. Through both approaches, one can gain more confidence in the discovery of functional materials with superior properties.

The open source code to implement clustering analyses in Python is provided in GitHub:

[https://github.com/yhcbloom14/stretchable\\_conductor/blob/main/clustering\\_analysis.ipynb](https://github.com/yhcbloom14/stretchable_conductor/blob/main/clustering_analysis.ipynb).



**Note S11. Crack propagation of G<sub>2</sub>–2D2D gold conductors.**

Quantified by the SEM images of a G<sub>2</sub>–2D2D gold conductor during a continuous strain loading process (in **Fig. 5e**), the statistical analyses of crack densities and crack areas are provided in **Fig. S20**. **Fig. S20a** illustrates how crack areas were measured. First, crack density is defined as the total number of cracks over a characterization area of SEM images. As shown in **Fig. S20b,c**, under 600% elongation, the G<sub>2</sub>–2D2D stretchable gold conductor showed no obvious cracks. Under 900% elongation, the sums of crack width and length were characterized as 886 and 432  $\mu\text{m}$ , respectively, resulting in the total crack area estimated to be  $0.045 \text{ mm}^2$ . Meanwhile, the crack density increased to  $0.5 \text{ mm}^{-2}$ . Once the elongation increased over 1,300%, the sums of crack width and length quickly increased to 16 and 13 mm, respectively, resulting in the total crack area estimated to be  $2.072 \text{ mm}^2$ , and the crack density increased to  $8.2 \text{ mm}^{-2}$ .

**Table S1. Photos of 286 G<sub>0</sub> nanocomposites with different MXene/SWNT/AuNP/PVA ratios as the training data points for the SVM regression model.**

|                                                                                    |                                                                                     |                                                                                     |                                                                                      |                                                                                       |
|------------------------------------------------------------------------------------|-------------------------------------------------------------------------------------|-------------------------------------------------------------------------------------|--------------------------------------------------------------------------------------|---------------------------------------------------------------------------------------|
| 1                                                                                  | 2                                                                                   | 3                                                                                   | 4                                                                                    | 5                                                                                     |
| 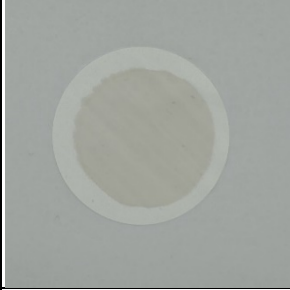   |    |    |    |    |
| 6                                                                                  | 7                                                                                   | 8                                                                                   | 9                                                                                    | 10                                                                                    |
|    |    |    |    |    |
| 11                                                                                 | 12                                                                                  | 13                                                                                  | 14                                                                                   | 15                                                                                    |
|  |  |  |  |  |
| 16                                                                                 | 17                                                                                  | 18                                                                                  | 19                                                                                   | 20                                                                                    |
|  |  |  |  |  |

|                                                                                     |                                                                                     |                                                                                     |                                                                                       |                                                                                       |
|-------------------------------------------------------------------------------------|-------------------------------------------------------------------------------------|-------------------------------------------------------------------------------------|---------------------------------------------------------------------------------------|---------------------------------------------------------------------------------------|
| 21                                                                                  | 22                                                                                  | 23                                                                                  | 24                                                                                    | 25                                                                                    |
|    |    |    |    |    |
| 26                                                                                  | 27                                                                                  | 28                                                                                  | 29                                                                                    | 30                                                                                    |
|    |    |    |    |    |
| 31                                                                                  | 32                                                                                  | 33                                                                                  | 34                                                                                    | 35                                                                                    |
|   |   |   |   |   |
| 36                                                                                  | 37                                                                                  | 38                                                                                  | 39                                                                                    | 40                                                                                    |
|  |  |  |  |  |
| 41                                                                                  | 42                                                                                  | 43                                                                                  | 44                                                                                    | 45                                                                                    |
|  |  |  |  |  |



|                                                                                     |                                                                                     |                                                                                     |                                                                                       |                                                                                       |
|-------------------------------------------------------------------------------------|-------------------------------------------------------------------------------------|-------------------------------------------------------------------------------------|---------------------------------------------------------------------------------------|---------------------------------------------------------------------------------------|
| 46                                                                                  | 47                                                                                  | 48                                                                                  | 49                                                                                    | 50                                                                                    |
| 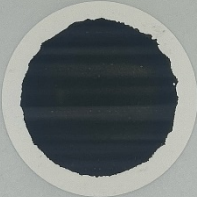   |    |    |    |    |
| 51                                                                                  | 52                                                                                  | 53                                                                                  | 54                                                                                    | 55                                                                                    |
|    |    |    |    |    |
| 56                                                                                  | 57                                                                                  | 58                                                                                  | 59                                                                                    | 60                                                                                    |
|   |   |   |   |   |
| 61                                                                                  | 62                                                                                  | 63                                                                                  | 64                                                                                    | 65                                                                                    |
|  |  |  |  |  |
| 66                                                                                  | 67                                                                                  | 68                                                                                  | 69                                                                                    | 70                                                                                    |
|  |  |  |  |  |

|                                                                                     |                                                                                     |                                                                                     |                                                                                       |                                                                                       |
|-------------------------------------------------------------------------------------|-------------------------------------------------------------------------------------|-------------------------------------------------------------------------------------|---------------------------------------------------------------------------------------|---------------------------------------------------------------------------------------|
| 71                                                                                  | 72                                                                                  | 73                                                                                  | 74                                                                                    | 75                                                                                    |
|    |    |    |    |    |
| 76                                                                                  | 77                                                                                  | 78                                                                                  | 79                                                                                    | 80                                                                                    |
|    |    |    |    |    |
| 81                                                                                  | 82                                                                                  | 83                                                                                  | 84                                                                                    | 85                                                                                    |
|   |   |   |   |   |
| 86                                                                                  | 87                                                                                  | 88                                                                                  | 89                                                                                    | 90                                                                                    |
|  |  |  |  |  |
| 91                                                                                  | 92                                                                                  | 93                                                                                  | 94                                                                                    | 95                                                                                    |
|  |  |  |  |  |



|                                                                                     |                                                                                     |                                                                                     |                                                                                       |                                                                                       |
|-------------------------------------------------------------------------------------|-------------------------------------------------------------------------------------|-------------------------------------------------------------------------------------|---------------------------------------------------------------------------------------|---------------------------------------------------------------------------------------|
| 96                                                                                  | 97                                                                                  | 98                                                                                  | 99                                                                                    | 100                                                                                   |
| 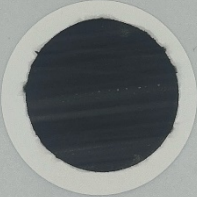   |    |    |    |    |
| 101                                                                                 | 102                                                                                 | 103                                                                                 | 104                                                                                   | 105                                                                                   |
|    |    |    |    |    |
| 106                                                                                 | 107                                                                                 | 108                                                                                 | 109                                                                                   | 110                                                                                   |
|   |   |   |    |   |
| 111                                                                                 | 112                                                                                 | 113                                                                                 | 114                                                                                   | 115                                                                                   |
|  |  |  |  |  |
| 116                                                                                 | 117                                                                                 | 118                                                                                 | 119                                                                                   | 120                                                                                   |
|  |  |  |  |  |

|                                                                                     |                                                                                     |                                                                                     |                                                                                       |                                                                                       |
|-------------------------------------------------------------------------------------|-------------------------------------------------------------------------------------|-------------------------------------------------------------------------------------|---------------------------------------------------------------------------------------|---------------------------------------------------------------------------------------|
| 121                                                                                 | 122                                                                                 | 123                                                                                 | 124                                                                                   | 125                                                                                   |
| 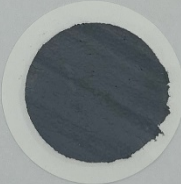   |    |    |    |    |
| 126                                                                                 | 127                                                                                 | 128                                                                                 | 129                                                                                   | 130                                                                                   |
|    |    |    |    |    |
| 131                                                                                 | 132                                                                                 | 133                                                                                 | 134                                                                                   | 135                                                                                   |
|   |   |   |   |   |
| 136                                                                                 | 137                                                                                 | 138                                                                                 | 139                                                                                   | 140                                                                                   |
|  |  |  |  |  |
| 141                                                                                 | 142                                                                                 | 143                                                                                 | 144                                                                                   | 145                                                                                   |
|  |  |  |  |  |



|                                                                                     |                                                                                     |                                                                                     |                                                                                       |                                                                                       |
|-------------------------------------------------------------------------------------|-------------------------------------------------------------------------------------|-------------------------------------------------------------------------------------|---------------------------------------------------------------------------------------|---------------------------------------------------------------------------------------|
| 146                                                                                 | 147                                                                                 | 148                                                                                 | 149                                                                                   | 150                                                                                   |
| 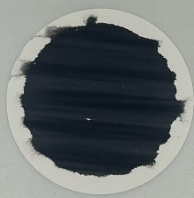   |    |    |    |    |
| 151                                                                                 | 152                                                                                 | 153                                                                                 | 154                                                                                   | 155                                                                                   |
|    |    |    |    |    |
| 156                                                                                 | 157                                                                                 | 158                                                                                 | 159                                                                                   | 160                                                                                   |
|   |   |   |    |   |
| 161                                                                                 | 162                                                                                 | 163                                                                                 | 164                                                                                   | 165                                                                                   |
|  |  |  |  |  |
| 166                                                                                 | 167                                                                                 | 168                                                                                 | 169                                                                                   | 170                                                                                   |
|  |  |  |  |  |



|                                                                                     |                                                                                     |                                                                                     |                                                                                       |                                                                                       |
|-------------------------------------------------------------------------------------|-------------------------------------------------------------------------------------|-------------------------------------------------------------------------------------|---------------------------------------------------------------------------------------|---------------------------------------------------------------------------------------|
| 171                                                                                 | 172                                                                                 | 173                                                                                 | 174                                                                                   | 175                                                                                   |
| 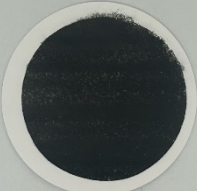   |    |    |    |    |
| 176                                                                                 | 177                                                                                 | 178                                                                                 | 179                                                                                   | 180                                                                                   |
|    |    |    |    |    |
| 181                                                                                 | 182                                                                                 | 183                                                                                 | 184                                                                                   | 185                                                                                   |
|   |   |   |   |   |
| 186                                                                                 | 187                                                                                 | 188                                                                                 | 189                                                                                   | 190                                                                                   |
|  |  |  |  |  |
| 191                                                                                 | 192                                                                                 | 193                                                                                 | 194                                                                                   | 195                                                                                   |
|  |  |  |  |  |

|                                                                                     |                                                                                     |                                                                                     |                                                                                       |                                                                                       |
|-------------------------------------------------------------------------------------|-------------------------------------------------------------------------------------|-------------------------------------------------------------------------------------|---------------------------------------------------------------------------------------|---------------------------------------------------------------------------------------|
| 196                                                                                 | 197                                                                                 | 198                                                                                 | 199                                                                                   | 200                                                                                   |
|    |    |    |    |    |
| 201                                                                                 | 202                                                                                 | 203                                                                                 | 204                                                                                   | 205                                                                                   |
|    |    |    |    |    |
| 206                                                                                 | 207                                                                                 | 208                                                                                 | 209                                                                                   | 210                                                                                   |
|   |   |   |   |   |
| 211                                                                                 | 212                                                                                 | 213                                                                                 | 214                                                                                   | 215                                                                                   |
|  |  |  |  |  |
| 216                                                                                 | 217                                                                                 | 218                                                                                 | 219                                                                                   | 220                                                                                   |
|  |  |  |  |  |



|                                                                                     |                                                                                     |                                                                                     |                                                                                       |                                                                                       |
|-------------------------------------------------------------------------------------|-------------------------------------------------------------------------------------|-------------------------------------------------------------------------------------|---------------------------------------------------------------------------------------|---------------------------------------------------------------------------------------|
| 221                                                                                 | 222                                                                                 | 223                                                                                 | 224                                                                                   | 225                                                                                   |
|    |    |    |    |    |
| 226                                                                                 | 227                                                                                 | 228                                                                                 | 229                                                                                   | 230                                                                                   |
|    |    |    |    |    |
| 231                                                                                 | 232                                                                                 | 233                                                                                 | 234                                                                                   | 235                                                                                   |
|   |   |   |   |   |
| 236                                                                                 | 237                                                                                 | 238                                                                                 | 239                                                                                   | 240                                                                                   |
|  |  |  |  |  |
| 241                                                                                 | 242                                                                                 | 243                                                                                 | 244                                                                                   | 245                                                                                   |
|  |  |  |  |  |

|                                                                                     |                                                                                     |                                                                                     |                                                                                       |                                                                                       |
|-------------------------------------------------------------------------------------|-------------------------------------------------------------------------------------|-------------------------------------------------------------------------------------|---------------------------------------------------------------------------------------|---------------------------------------------------------------------------------------|
| 246                                                                                 | 247                                                                                 | 248                                                                                 | 249                                                                                   | 250                                                                                   |
|    |    |    |    |    |
| 251                                                                                 | 252                                                                                 | 253                                                                                 | 254                                                                                   | 255                                                                                   |
|    |    |    |    |    |
| 256                                                                                 | 257                                                                                 | 258                                                                                 | 259                                                                                   | 260                                                                                   |
|   |   |   |   |   |
| 261                                                                                 | 262                                                                                 | 263                                                                                 | 264                                                                                   | 265                                                                                   |
|  |  |  |  |  |
| 266                                                                                 | 267                                                                                 | 268                                                                                 | 269                                                                                   | 270                                                                                   |
|  |  |  |  |  |

|                                                                                     |                                                                                    |                                                                                    |                                                                                      |                                                                                      |
|-------------------------------------------------------------------------------------|------------------------------------------------------------------------------------|------------------------------------------------------------------------------------|--------------------------------------------------------------------------------------|--------------------------------------------------------------------------------------|
| 271                                                                                 | 272                                                                                | 273                                                                                | 274                                                                                  | 275                                                                                  |
| 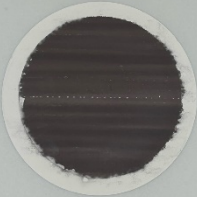   |   |   |   |   |
| 276                                                                                 | 277                                                                                | 278                                                                                | 279                                                                                  | 280                                                                                  |
|    |   |   |   |   |
| 281                                                                                 | 282                                                                                | 283                                                                                | 284                                                                                  | 285                                                                                  |
|   |  |  |  |  |
| 286                                                                                 |                                                                                    |                                                                                    |                                                                                      |                                                                                      |
|  |                                                                                    |                                                                                    |                                                                                      |                                                                                      |



**Table S2. Electrical conductance of 286 G<sub>0</sub> nanocomposites with different MXene/SWNT/AuNP/PVA ratios as the training data points for the SVM regression model.**

| ID | MXene/SWNT/AuNP/PVA Ratio |                        |                        |                       | $S_0$<br>(mS) |
|----|---------------------------|------------------------|------------------------|-----------------------|---------------|
|    | MXene Loading<br>(wt.%)   | SWNT Loading<br>(wt.%) | AuNP Loading<br>(wt.%) | PVA Loading<br>(wt.%) |               |
| 1  | 0                         | 0                      | 0                      | 100                   | 0.00          |
| 2  | 10                        | 0                      | 0                      | 90                    | 0.19          |
| 3  | 20                        | 0                      | 0                      | 80                    | 0.32          |
| 4  | 30                        | 0                      | 0                      | 70                    | 0.59          |
| 5  | 40                        | 0                      | 0                      | 60                    | 1.02          |
| 6  | 50                        | 0                      | 0                      | 50                    | 1.39          |
| 7  | 60                        | 0                      | 0                      | 40                    | 3.05          |
| 8  | 70                        | 0                      | 0                      | 30                    | 4.07          |
| 9  | 80                        | 0                      | 0                      | 20                    | 6.29          |
| 10 | 90                        | 0                      | 0                      | 10                    | 8.06          |
| 11 | 100                       | 0                      | 0                      | 0                     | 40.00         |
| 12 | 0                         | 10                     | 0                      | 90                    | 0.00          |
| 13 | 10                        | 10                     | 0                      | 80                    | 0.09          |
| 14 | 20                        | 10                     | 0                      | 70                    | 0.18          |
| 15 | 30                        | 10                     | 0                      | 60                    | 0.33          |
| 16 | 40                        | 10                     | 0                      | 50                    | 0.43          |
| 17 | 50                        | 10                     | 0                      | 40                    | 0.65          |
| 18 | 60                        | 10                     | 0                      | 30                    | 1.15          |
| 19 | 70                        | 10                     | 0                      | 20                    | 4.55          |
| 20 | 80                        | 10                     | 0                      | 10                    | 5.41          |
| 21 | 90                        | 10                     | 0                      | 0                     | 15.15         |
| 22 | 0                         | 20                     | 0                      | 80                    | 0.07          |
| 23 | 10                        | 20                     | 0                      | 70                    | 0.26          |
| 24 | 20                        | 20                     | 0                      | 60                    | 0.53          |
| 25 | 30                        | 20                     | 0                      | 50                    | 0.56          |
| 26 | 40                        | 20                     | 0                      | 40                    | 2.60          |
| 27 | 50                        | 20                     | 0                      | 30                    | 3.29          |
| 28 | 60                        | 20                     | 0                      | 20                    | 3.79          |
| 29 | 70                        | 20                     | 0                      | 10                    | 6.58          |
| 30 | 80                        | 20                     | 0                      | 0                     | 18.18         |
| 31 | 0                         | 30                     | 0                      | 70                    | 0.24          |
| 32 | 10                        | 30                     | 0                      | 60                    | 0.32          |
| 33 | 20                        | 30                     | 0                      | 50                    | 0.53          |
| 34 | 30                        | 30                     | 0                      | 40                    | 2.00          |
| 35 | 40                        | 30                     | 0                      | 30                    | 4.05          |

|    |    |     |    |    |       |
|----|----|-----|----|----|-------|
| 36 | 50 | 30  | 0  | 20 | 4.59  |
| 37 | 60 | 30  | 0  | 10 | 5.95  |
| 38 | 70 | 30  | 0  | 0  | 17.86 |
| 39 | 0  | 40  | 0  | 60 | 0.07  |
| 40 | 10 | 40  | 0  | 50 | 0.61  |
| 41 | 20 | 40  | 0  | 40 | 0.83  |
| 42 | 30 | 40  | 0  | 30 | 3.24  |
| 43 | 40 | 40  | 0  | 20 | 5.05  |
| 44 | 50 | 40  | 0  | 10 | 8.55  |
| 45 | 60 | 40  | 0  | 0  | 23.26 |
| 46 | 0  | 50  | 0  | 50 | 0.16  |
| 47 | 10 | 50  | 0  | 40 | 1.80  |
| 48 | 20 | 50  | 0  | 30 | 2.94  |
| 49 | 30 | 50  | 0  | 20 | 4.59  |
| 50 | 40 | 50  | 0  | 10 | 10.00 |
| 51 | 50 | 50  | 0  | 0  | 27.78 |
| 52 | 0  | 60  | 0  | 40 | 0.83  |
| 53 | 10 | 60  | 0  | 30 | 2.49  |
| 54 | 20 | 60  | 0  | 20 | 3.73  |
| 55 | 30 | 60  | 0  | 10 | 7.30  |
| 56 | 40 | 60  | 0  | 0  | 26.32 |
| 57 | 0  | 70  | 0  | 30 | 0.78  |
| 58 | 10 | 70  | 0  | 20 | 2.53  |
| 59 | 20 | 70  | 0  | 10 | 6.99  |
| 60 | 30 | 70  | 0  | 0  | 21.28 |
| 61 | 0  | 80  | 0  | 20 | 0.83  |
| 62 | 10 | 80  | 0  | 10 | 6.45  |
| 63 | 20 | 80  | 0  | 0  | 31.25 |
| 64 | 0  | 90  | 0  | 10 | 5.46  |
| 65 | 10 | 90  | 0  | 0  | 35.71 |
| 66 | 0  | 100 | 0  | 0  | 55.56 |
| 67 | 0  | 0   | 10 | 90 | 0.00  |
| 68 | 10 | 0   | 10 | 80 | 0.20  |
| 69 | 20 | 0   | 10 | 70 | 0.34  |
| 70 | 30 | 0   | 10 | 60 | 0.72  |
| 71 | 40 | 0   | 10 | 50 | 1.30  |
| 72 | 50 | 0   | 10 | 40 | 1.90  |
| 73 | 60 | 0   | 10 | 30 | 3.25  |
| 74 | 70 | 0   | 10 | 20 | 5.43  |
| 75 | 80 | 0   | 10 | 10 | 20.00 |
| 76 | 90 | 0   | 10 | 0  | 28.57 |

|     |    |    |    |    |       |
|-----|----|----|----|----|-------|
| 77  | 0  | 10 | 10 | 80 | 0.11  |
| 78  | 10 | 10 | 10 | 70 | 0.16  |
| 79  | 20 | 10 | 10 | 60 | 0.39  |
| 80  | 30 | 10 | 10 | 50 | 0.47  |
| 81  | 40 | 10 | 10 | 40 | 0.69  |
| 82  | 50 | 10 | 10 | 30 | 3.23  |
| 83  | 60 | 10 | 10 | 20 | 4.35  |
| 84  | 70 | 10 | 10 | 10 | 6.17  |
| 85  | 80 | 10 | 10 | 0  | 21.28 |
| 86  | 0  | 20 | 10 | 70 | 0.17  |
| 87  | 10 | 20 | 10 | 60 | 0.25  |
| 88  | 20 | 20 | 10 | 50 | 0.34  |
| 89  | 30 | 20 | 10 | 40 | 0.61  |
| 90  | 40 | 20 | 10 | 30 | 1.10  |
| 91  | 50 | 20 | 10 | 20 | 3.50  |
| 92  | 60 | 20 | 10 | 10 | 5.85  |
| 93  | 70 | 20 | 10 | 0  | 29.41 |
| 94  | 0  | 30 | 10 | 60 | 0.96  |
| 95  | 10 | 30 | 10 | 50 | 1.12  |
| 96  | 20 | 30 | 10 | 40 | 1.48  |
| 97  | 30 | 30 | 10 | 30 | 3.77  |
| 98  | 40 | 30 | 10 | 20 | 4.76  |
| 99  | 50 | 30 | 10 | 10 | 7.69  |
| 100 | 60 | 30 | 10 | 0  | 22.22 |
| 101 | 0  | 40 | 10 | 50 | 0.75  |
| 102 | 10 | 40 | 10 | 40 | 2.52  |
| 103 | 20 | 40 | 10 | 30 | 4.74  |
| 104 | 30 | 40 | 10 | 20 | 5.05  |
| 105 | 40 | 40 | 10 | 10 | 8.33  |
| 106 | 50 | 40 | 10 | 0  | 33.33 |
| 107 | 0  | 50 | 10 | 40 | 1.95  |
| 108 | 10 | 50 | 10 | 30 | 4.39  |
| 109 | 20 | 50 | 10 | 20 | 6.10  |
| 110 | 30 | 50 | 10 | 10 | 7.69  |
| 111 | 40 | 50 | 10 | 0  | 20.83 |
| 112 | 0  | 60 | 10 | 30 | 3.31  |
| 113 | 10 | 60 | 10 | 20 | 4.24  |
| 114 | 20 | 60 | 10 | 10 | 7.09  |
| 115 | 30 | 60 | 10 | 0  | 18.52 |
| 116 | 0  | 70 | 10 | 20 | 2.76  |
| 117 | 10 | 70 | 10 | 10 | 6.76  |



|     |    |    |    |    |       |
|-----|----|----|----|----|-------|
| 118 | 20 | 70 | 10 | 0  | 16.67 |
| 119 | 0  | 80 | 10 | 10 | 4.13  |
| 120 | 10 | 80 | 10 | 0  | 16.13 |
| 121 | 0  | 90 | 10 | 0  | 15.15 |
| 122 | 0  | 0  | 20 | 80 | 0.00  |
| 123 | 10 | 0  | 20 | 70 | 0.43  |
| 124 | 20 | 0  | 20 | 60 | 0.71  |
| 125 | 30 | 0  | 20 | 50 | 2.50  |
| 126 | 40 | 0  | 20 | 40 | 4.13  |
| 127 | 50 | 0  | 20 | 30 | 6.62  |
| 128 | 60 | 0  | 20 | 20 | 10.10 |
| 129 | 70 | 0  | 20 | 10 | 12.66 |
| 130 | 80 | 0  | 20 | 0  | 25.00 |
| 131 | 0  | 10 | 20 | 70 | 0.16  |
| 132 | 10 | 10 | 20 | 60 | 0.23  |
| 133 | 20 | 10 | 20 | 50 | 0.37  |
| 134 | 30 | 10 | 20 | 40 | 0.58  |
| 135 | 40 | 10 | 20 | 30 | 1.43  |
| 136 | 50 | 10 | 20 | 20 | 3.05  |
| 137 | 60 | 10 | 20 | 10 | 4.24  |
| 138 | 70 | 10 | 20 | 0  | 10.75 |
| 139 | 0  | 20 | 20 | 60 | 0.41  |
| 140 | 10 | 20 | 20 | 50 | 0.88  |
| 141 | 20 | 20 | 20 | 40 | 1.14  |
| 142 | 30 | 20 | 20 | 30 | 2.96  |
| 143 | 40 | 20 | 20 | 20 | 4.35  |
| 144 | 50 | 20 | 20 | 10 | 4.57  |
| 145 | 60 | 20 | 20 | 0  | 33.33 |
| 146 | 0  | 30 | 20 | 50 | 0.52  |
| 147 | 10 | 30 | 20 | 40 | 1.28  |
| 148 | 20 | 30 | 20 | 30 | 3.56  |
| 149 | 30 | 30 | 20 | 20 | 4.35  |
| 150 | 40 | 30 | 20 | 10 | 6.58  |
| 151 | 50 | 30 | 20 | 0  | 10.75 |
| 152 | 0  | 40 | 20 | 40 | 1.16  |
| 153 | 10 | 40 | 20 | 30 | 2.99  |
| 154 | 20 | 40 | 20 | 20 | 4.76  |
| 155 | 30 | 40 | 20 | 10 | 5.49  |
| 156 | 40 | 40 | 20 | 0  | 16.39 |
| 157 | 0  | 50 | 20 | 30 | 2.35  |
| 158 | 10 | 50 | 20 | 20 | 3.23  |

|     |    |    |    |    |       |
|-----|----|----|----|----|-------|
| 159 | 20 | 50 | 20 | 10 | 4.72  |
| 160 | 30 | 50 | 20 | 0  | 11.76 |
| 161 | 0  | 60 | 20 | 20 | 3.95  |
| 162 | 10 | 60 | 20 | 10 | 7.63  |
| 163 | 20 | 60 | 20 | 0  | 35.71 |
| 164 | 0  | 70 | 20 | 10 | 7.25  |
| 165 | 10 | 70 | 20 | 0  | 23.81 |
| 166 | 0  | 80 | 20 | 0  | 22.73 |
| 167 | 0  | 0  | 30 | 70 | 0.00  |
| 168 | 10 | 0  | 30 | 60 | 0.32  |
| 169 | 20 | 0  | 30 | 50 | 0.73  |
| 170 | 30 | 0  | 30 | 40 | 1.78  |
| 171 | 40 | 0  | 30 | 30 | 4.17  |
| 172 | 50 | 0  | 30 | 20 | 9.35  |
| 173 | 60 | 0  | 30 | 10 | 14.08 |
| 174 | 70 | 0  | 30 | 0  | 28.57 |
| 175 | 0  | 10 | 30 | 60 | 0.25  |
| 176 | 10 | 10 | 30 | 50 | 0.56  |
| 177 | 20 | 10 | 30 | 40 | 0.82  |
| 178 | 30 | 10 | 30 | 30 | 2.08  |
| 179 | 40 | 10 | 30 | 20 | 3.80  |
| 180 | 50 | 10 | 30 | 10 | 4.59  |
| 181 | 60 | 10 | 30 | 0  | 14.49 |
| 182 | 0  | 20 | 30 | 50 | 0.68  |
| 183 | 10 | 20 | 30 | 40 | 1.20  |
| 184 | 20 | 20 | 30 | 30 | 1.84  |
| 185 | 30 | 20 | 30 | 20 | 3.37  |
| 186 | 40 | 20 | 30 | 10 | 6.10  |
| 187 | 50 | 20 | 30 | 0  | 31.25 |
| 188 | 0  | 30 | 30 | 40 | 0.65  |
| 189 | 10 | 30 | 30 | 30 | 1.60  |
| 190 | 20 | 30 | 30 | 20 | 2.33  |
| 191 | 30 | 30 | 30 | 10 | 4.13  |
| 192 | 40 | 30 | 30 | 0  | 34.48 |
| 193 | 0  | 40 | 30 | 30 | 2.30  |
| 194 | 10 | 40 | 30 | 20 | 3.48  |
| 195 | 20 | 40 | 30 | 10 | 7.58  |
| 196 | 30 | 40 | 30 | 0  | 18.87 |
| 197 | 0  | 50 | 30 | 20 | 5.38  |
| 198 | 10 | 50 | 30 | 10 | 7.69  |
| 199 | 20 | 50 | 30 | 0  | 21.28 |

|     |    |    |    |    |       |
|-----|----|----|----|----|-------|
| 200 | 0  | 60 | 30 | 10 | 9.43  |
| 201 | 10 | 60 | 30 | 0  | 21.74 |
| 202 | 0  | 70 | 30 | 0  | 18.87 |
| 203 | 0  | 0  | 40 | 60 | 0.00  |
| 204 | 10 | 0  | 40 | 50 | 0.83  |
| 205 | 20 | 0  | 40 | 40 | 1.73  |
| 206 | 30 | 0  | 40 | 30 | 3.79  |
| 207 | 40 | 0  | 40 | 20 | 7.25  |
| 208 | 50 | 0  | 40 | 10 | 10.64 |
| 209 | 60 | 0  | 40 | 0  | 6.94  |
| 210 | 0  | 10 | 40 | 50 | 0.43  |
| 211 | 10 | 10 | 40 | 40 | 0.54  |
| 212 | 20 | 10 | 40 | 30 | 1.20  |
| 213 | 30 | 10 | 40 | 20 | 3.22  |
| 214 | 40 | 10 | 40 | 10 | 5.21  |
| 215 | 50 | 10 | 40 | 0  | 8.20  |
| 216 | 0  | 20 | 40 | 40 | 1.01  |
| 217 | 10 | 20 | 40 | 30 | 1.57  |
| 218 | 20 | 20 | 40 | 20 | 2.82  |
| 219 | 30 | 20 | 40 | 10 | 4.26  |
| 220 | 40 | 20 | 40 | 0  | 11.36 |
| 221 | 0  | 30 | 40 | 30 | 1.79  |
| 222 | 10 | 30 | 40 | 20 | 3.07  |
| 223 | 20 | 30 | 40 | 10 | 5.21  |
| 224 | 30 | 30 | 40 | 0  | 13.70 |
| 225 | 0  | 40 | 40 | 20 | 5.24  |
| 226 | 10 | 40 | 40 | 10 | 6.17  |
| 227 | 20 | 40 | 40 | 0  | 38.46 |
| 228 | 0  | 50 | 40 | 10 | 8.55  |
| 229 | 10 | 50 | 40 | 0  | 47.62 |
| 230 | 0  | 60 | 40 | 0  | 12.82 |
| 231 | 0  | 0  | 50 | 50 | 0.00  |
| 232 | 10 | 0  | 50 | 40 | 0.80  |
| 233 | 20 | 0  | 50 | 30 | 1.87  |
| 234 | 30 | 0  | 50 | 20 | 7.25  |
| 235 | 40 | 0  | 50 | 10 | 8.26  |
| 236 | 50 | 0  | 50 | 0  | 28.57 |
| 237 | 0  | 10 | 50 | 40 | 0.49  |
| 238 | 10 | 10 | 50 | 30 | 0.89  |
| 239 | 20 | 10 | 50 | 20 | 1.29  |
| 240 | 30 | 10 | 50 | 10 | 3.34  |

|     |    |    |    |    |       |
|-----|----|----|----|----|-------|
| 241 | 40 | 10 | 50 | 0  | 12.35 |
| 242 | 0  | 20 | 50 | 30 | 2.22  |
| 243 | 10 | 20 | 50 | 20 | 4.12  |
| 244 | 20 | 20 | 50 | 10 | 4.65  |
| 245 | 30 | 20 | 50 | 0  | 11.49 |
| 246 | 0  | 30 | 50 | 20 | 6.49  |
| 247 | 10 | 30 | 50 | 10 | 7.75  |
| 248 | 20 | 30 | 50 | 0  | 38.46 |
| 249 | 0  | 40 | 50 | 10 | 8.55  |
| 250 | 10 | 40 | 50 | 0  | 19.23 |
| 251 | 0  | 50 | 50 | 0  | 20.83 |
| 252 | 0  | 0  | 60 | 40 | 0.00  |
| 253 | 10 | 0  | 60 | 30 | 1.15  |
| 254 | 20 | 0  | 60 | 20 | 5.10  |
| 255 | 30 | 0  | 60 | 10 | 8.85  |
| 256 | 40 | 0  | 60 | 0  | 29.41 |
| 257 | 0  | 10 | 60 | 30 | 0.22  |
| 258 | 10 | 10 | 60 | 20 | 0.38  |
| 259 | 20 | 10 | 60 | 10 | 3.42  |
| 260 | 30 | 10 | 60 | 0  | 13.16 |
| 261 | 0  | 20 | 60 | 20 | 4.65  |
| 262 | 10 | 20 | 60 | 10 | 5.78  |
| 263 | 20 | 20 | 60 | 0  | 30.30 |
| 264 | 0  | 30 | 60 | 10 | 10.10 |
| 265 | 10 | 30 | 60 | 0  | 37.04 |
| 266 | 0  | 40 | 60 | 0  | 9.80  |
| 267 | 0  | 0  | 70 | 30 | 0.00  |
| 268 | 10 | 0  | 70 | 20 | 4.85  |
| 269 | 20 | 0  | 70 | 10 | 6.37  |
| 270 | 30 | 0  | 70 | 0  | 25.64 |
| 271 | 0  | 10 | 70 | 20 | 2.22  |
| 272 | 10 | 10 | 70 | 10 | 6.90  |
| 273 | 20 | 10 | 70 | 0  | 8.47  |
| 274 | 0  | 20 | 70 | 10 | 10.10 |
| 275 | 10 | 20 | 70 | 0  | 9.35  |
| 276 | 0  | 30 | 70 | 0  | 10.42 |
| 277 | 0  | 0  | 80 | 20 | 0.00  |
| 278 | 10 | 0  | 80 | 10 | 2.70  |
| 279 | 20 | 0  | 80 | 0  | 29.41 |
| 280 | 0  | 10 | 80 | 10 | 3.69  |
| 281 | 10 | 10 | 80 | 0  | 17.86 |

|     |    |    |     |    |       |
|-----|----|----|-----|----|-------|
| 282 | 0  | 20 | 80  | 0  | 10.00 |
| 283 | 0  | 0  | 90  | 10 | 0.00  |
| 284 | 10 | 0  | 90  | 0  | 22.22 |
| 285 | 0  | 10 | 90  | 0  | 5.15  |
| 286 | 0  | 0  | 100 | 0  | 0.00  |

**Table S3. Photos of 42 G<sub>0</sub> nanocomposites with different MXene/SWNT/AuNP/PVA ratios as the testing data points for the SVM regression model.**

|                                                                                     |                                                                                     |                                                                                     |                                                                                       |                                                                                       |
|-------------------------------------------------------------------------------------|-------------------------------------------------------------------------------------|-------------------------------------------------------------------------------------|---------------------------------------------------------------------------------------|---------------------------------------------------------------------------------------|
| 1                                                                                   | 2                                                                                   | 3                                                                                   | 4                                                                                     | 5                                                                                     |
|    |    |    |    |    |
| 6                                                                                   | 7                                                                                   | 8                                                                                   | 9                                                                                     | 10                                                                                    |
|    |    |    |    |    |
| 11                                                                                  | 12                                                                                  | 13                                                                                  | 14                                                                                    | 15                                                                                    |
|  |  |  |  |  |
| 16                                                                                  | 17                                                                                  | 18                                                                                  | 19                                                                                    | 20                                                                                    |
|  |  |  |  |  |

|                                                                                     |                                                                                     |                                                                                     |                                                                                       |                                                                                       |
|-------------------------------------------------------------------------------------|-------------------------------------------------------------------------------------|-------------------------------------------------------------------------------------|---------------------------------------------------------------------------------------|---------------------------------------------------------------------------------------|
| 21                                                                                  | 22                                                                                  | 23                                                                                  | 24                                                                                    | 25                                                                                    |
|    |    |    |    |    |
| 26                                                                                  | 27                                                                                  | 28                                                                                  | 29                                                                                    | 30                                                                                    |
|    |    |    |    |    |
| 31                                                                                  | 32                                                                                  | 33                                                                                  | 34                                                                                    | 35                                                                                    |
|  |  |  |  |  |
| 36                                                                                  | 37                                                                                  | 38                                                                                  | 39                                                                                    | 40                                                                                    |
|  |  |  |  |  |
| 41                                                                                  | 42                                                                                  |                                                                                     |                                                                                       |                                                                                       |
|  |  |                                                                                     |                                                                                       |                                                                                       |

**Table S4. Electrical conductance of 42 G<sub>0</sub> nanocomposites with different MXene/SWNT/AuNP/PVA ratios as the testing data points for the SVM regression model.**

| ID | MXene/SWNT/AuNP/PVA Ratio |                        |                        |                       | S <sub>0</sub><br>(mS) |
|----|---------------------------|------------------------|------------------------|-----------------------|------------------------|
|    | MXene Loading<br>(wt.%)   | SWNT Loading<br>(wt.%) | AuNP Loading<br>(wt.%) | PVA Loading<br>(wt.%) |                        |
| 1  | 49.5                      | 50.5                   | 0.0                    | 0.0                   | 76.92                  |
| 2  | 12.7                      | 41.0                   | 41.3                   | 5.0                   | 7.87                   |
| 3  | 12.3                      | 78.3                   | 6.5                    | 2.9                   | 12.50                  |
| 4  | 7.2                       | 30.0                   | 59.4                   | 3.4                   | 8.33                   |
| 5  | 34.9                      | 32.1                   | 31.0                   | 2.1                   | 7.14                   |
| 6  | 4.9                       | 86.9                   | 6.2                    | 2.0                   | 20.00                  |
| 7  | 40.2                      | 44.8                   | 21.4                   | 3.6                   | 13.51                  |
| 8  | 40.2                      | 42.4                   | 8.8                    | 8.6                   | 8.77                   |
| 9  | 45.8                      | 36.8                   | 13.9                   | 3.5                   | 7.14                   |
| 10 | 84.4                      | 4.6                    | 8.6                    | 2.4                   | 7.58                   |
| 11 | 17.5                      | 67.0                   | 9.2                    | 6.4                   | 8.55                   |
| 12 | 41.9                      | 33.8                   | 9.4                    | 14.9                  | 2.22                   |
| 13 | 65.9                      | 15.3                   | 6.8                    | 12.0                  | 3.12                   |
| 14 | 5.7                       | 79.0                   | 7.7                    | 7.6                   | 14.29                  |
| 15 | 55.9                      | 32.6                   | 5.3                    | 6.2                   | 6.90                   |
| 16 | 12.5                      | 53.2                   | 24.3                   | 10.0                  | 2.50                   |
| 17 | 23.6                      | 63.4                   | 11.0                   | 1.9                   | 8.93                   |
| 18 | 20.2                      | 47.8                   | 20.8                   | 11.3                  | 2.22                   |
| 19 | 36.3                      | 56.9                   | 4.9                    | 1.9                   | 8.13                   |
| 20 | 7.4                       | 76.5                   | 7.5                    | 8.6                   | 7.25                   |
| 21 | 55.8                      | 35.2                   | 6.6                    | 2.4                   | 8.33                   |
| 22 | 29.4                      | 51.5                   | 15.1                   | 4.1                   | 7.35                   |
| 23 | 25.5                      | 63.6                   | 8.2                    | 2.6                   | 8.47                   |
| 24 | 27.2                      | 52.9                   | 10.8                   | 9.1                   | 6.76                   |
| 25 | 73.7                      | 7.2                    | 5.4                    | 13.7                  | 2.58                   |
| 26 | 5.8                       | 53.3                   | 0.0                    | 40.8                  | 1.13                   |
| 27 | 12.5                      | 21.7                   | 11.7                   | 54.2                  | 0.39                   |
| 28 | 38.3                      | 20.3                   | 7.2                    | 34.2                  | 0.32                   |
| 29 | 30.0                      | 19.2                   | 17.5                   | 33.3                  | 0.36                   |
| 30 | 70.0                      | 9.2                    | 7.0                    | 13.8                  | 2.28                   |
| 31 | 18.3                      | 38.3                   | 25.0                   | 18.3                  | 2.02                   |
| 32 | 70.8                      | 4.7                    | 8.7                    | 15.8                  | 2.14                   |
| 33 | 6.3                       | 42.8                   | 16.7                   | 34.2                  | 1.18                   |
| 34 | 8.7                       | 38.8                   | 12.5                   | 40.0                  | 0.91                   |
| 35 | 28.3                      | 11.7                   | 28.3                   | 31.7                  | 0.21                   |



|    |      |      |      |      |      |
|----|------|------|------|------|------|
| 36 | 25.0 | 10.0 | 34.2 | 30.8 | 0.17 |
| 37 | 41.7 | 13.3 | 10.0 | 35.0 | 0.19 |
| 38 | 7.5  | 26.7 | 0.0  | 65.8 | 0.43 |
| 39 | 18.3 | 17.5 | 15.8 | 48.3 | 0.29 |
| 40 | 32.5 | 18.3 | 19.2 | 30.0 | 0.35 |
| 41 | 12.5 | 43.3 | 15.8 | 28.3 | 1.05 |
| 42 | 23.3 | 18.3 | 41.7 | 16.7 | 0.50 |

**Table S5. Training data points for the prediction model.**

| Round # | Composition Labels   |                     |                     |                    | Thickness Labels | Deformation Labels   | Strain Labels  | Electrical Labels | Response Labels         |                           |                          |
|---------|----------------------|---------------------|---------------------|--------------------|------------------|----------------------|----------------|-------------------|-------------------------|---------------------------|--------------------------|
|         | MXene Loading (wt.%) | SWNT Loading (wt.%) | AuNP Loading (wt.%) | PVA Loading (wt.%) | Thickness (nm)   | Deformation Sequence | Pre-Strain (%) | $S_0$ (mS)        | $\varepsilon_{5\%}$ (%) | $\varepsilon_{7.5\%}$ (%) | $\varepsilon_{10\%}$ (%) |
| 1       | 61.0                 | 20.0                | 15.0                | 4.0                | 1,200            | G <sub>1</sub> -1D   | 0              | 5.57              | 67                      | 67                        | 67                       |
| 1       | 5.0                  | 80.0                | 5.0                 | 10.0               | 1,200            | G <sub>2</sub> -2D2D | 100            | 9.06              | 198                     | 202                       | 206                      |
| 1       | 46.0                 | 40.0                | 10.0                | 4.0                | 1,200            | G <sub>2</sub> -2D2D | 300            | 13.39             | 240                     | 291                       | 330                      |
| 1       | 56.0                 | 40.0                | 0.0                 | 4.0                | 800              | G <sub>2</sub> -2D1D | 100            | 9.05              | 209                     | 218                       | 222                      |
| 1       | 67.0                 | 15.0                | 15.0                | 3.0                | 1,200            | G <sub>2</sub> -2D1D | 100            | 19.92             | 200                     | 217                       | 229                      |
| 1       | 23.5                 | 50.0                | 25.0                | 1.5                | 1,600            | G <sub>1</sub> -2D   | 0              | 20.16             | 43                      | 45                        | 47                       |
| 1       | 100.0                | 0.0                 | 0.0                 | 0.0                | 1,600            | G <sub>1</sub> -2D   | 0              | 128.21            | 30                      | 33                        | 33                       |
| 1       | 0.0                  | 93.0                | 5.0                 | 2.0                | 1,200            | G <sub>2</sub> -2D2D | 200            | 15.34             | 383                     | 388                       | 393                      |
| 1       | 25.0                 | 70.0                | 2.0                 | 3.0                | 1,600            | G <sub>1</sub> -2D   | 0              | 29.41             | 35                      | 38                        | 40                       |
| 1       | 20.0                 | 80.0                | 0.0                 | 0.0                | 1,200            | G <sub>2</sub> -2D2D | 200            | 20.16             | 266                     | 341                       | 363                      |
| 1       | 49.5                 | 50.5                | 0.0                 | 0.0                | 1,200            | G <sub>2</sub> -2D2D | 100            | 31.15             | 184                     | 194                       | 201                      |
| 1       | 12.7                 | 41.0                | 41.3                | 5.0                | 1,200            | G <sub>2</sub> -2D1D | 200            | 7.48              | 415                     | 450                       | 460                      |
| 1       | 12.3                 | 78.3                | 6.5                 | 2.9                | 1,200            | G <sub>2</sub> -2D1D | 300            | 8.52              | 564                     | 586                       | 602                      |
| 1       | 17.0                 | 45.6                | 31.9                | 5.4                | 800              | G <sub>1</sub> -1D   | 0              | 6.48              | 93                      | 93                        | 93                       |
| 2       | 7.2                  | 30.0                | 59.4                | 3.4                | 1,200            | G <sub>2</sub> -2D1D | 100            | 7.70              | 264                     | 269                       | 270                      |
| 2       | 34.9                 | 32.1                | 31.0                | 2.1                | 800              | G <sub>2</sub> -2D2D | 200            | 6.62              | 279                     | 296                       | 305                      |
| 2       | 10.0                 | 32.0                | 50.0                | 8.0                | 1,600            | G <sub>2</sub> -2D2D | 200            | 4.64              | 341                     | 361                       | 369                      |
| 2       | 35.0                 | 58.0                | 1.0                 | 6.0                | 800              | G <sub>2</sub> -2D2D | 200            | 10.38             | 305                     | 315                       | 323                      |
| 2       | 42.0                 | 30.0                | 15.0                | 13.0               | 1,600            | G <sub>2</sub> -2D2D | 100            | 7.65              | 188                     | 205                       | 216                      |
| 2       | 3.9                  | 87.9                | 6.2                 | 2.0                | 1,200            | G <sub>1</sub> -1D   | 0              | 16.21             | 83                      | 84                        | 85                       |
| 2       | 2.8                  | 31.4                | 57.9                | 7.9                | 1,200            | G <sub>1</sub> -2D   | 0              | 7.70              | 40                      | 43                        | 45                       |
| 2       | 30.2                 | 34.8                | 21.4                | 13.6               | 800              | G <sub>1</sub> -2D   | 0              | 6.59              | 33                      | 35                        | 36                       |
| 2       | 24.6                 | 40.0                | 27.9                | 7.6                | 1,600            | G <sub>1</sub> -1D   | 0              | 15.20             | 40                      | 42                        | 42                       |

|   |      |      |      |      |       |                      |     |       |     |     |     |
|---|------|------|------|------|-------|----------------------|-----|-------|-----|-----|-----|
| 2 | 34.8 | 35.4 | 21.6 | 8.2  | 800   | G <sub>1</sub> -2D   | 0   | 8.81  | 43  | 48  | 50  |
| 2 | 40.2 | 42.4 | 8.8  | 8.6  | 1,600 | G <sub>2</sub> -2D1D | 200 | 15.92 | 281 | 303 | 316 |
| 2 | 17.9 | 7.6  | 68.1 | 6.5  | 1,200 | G <sub>2</sub> -2D2D | 100 | 9.94  | 262 | 267 | 269 |
| 2 | 45.8 | 36.8 | 13.9 | 3.5  | 1,200 | G <sub>2</sub> -2D2D | 200 | 23.75 | 296 | 320 | 332 |
| 2 | 36.6 | 38.0 | 23.8 | 1.7  | 800   | G <sub>2</sub> -2D2D | 100 | 8.18  | 185 | 197 | 208 |
| 2 | 4.2  | 41.0 | 51.6 | 3.2  | 1,600 | G <sub>2</sub> -2D1D | 100 | 15.53 | 364 | 369 | 381 |
| 2 | 84.4 | 4.6  | 8.6  | 2.4  | 1,600 | G <sub>1</sub> -2D   | 0   | 22.32 | 28  | 31  | 33  |
| 2 | 19.6 | 47.7 | 31.4 | 1.2  | 800   | G <sub>1</sub> -2D   | 0   | 13.51 | 62  | 64  | 66  |
| 2 | 55.9 | 23.6 | 13.1 | 7.5  | 800   | G <sub>1</sub> -2D   | 0   | 6.03  | 45  | 50  | 53  |
| 2 | 17.5 | 67.0 | 9.2  | 6.4  | 1,200 | G <sub>2</sub> -2D1D | 100 | 13.26 | 234 | 239 | 242 |
| 2 | 41.9 | 33.8 | 9.4  | 14.9 | 1,200 | G <sub>2</sub> -2D1D | 100 | 5.62  | 277 | 286 | 292 |
| 2 | 15.7 | 63.7 | 13.5 | 7.1  | 1,600 | G <sub>2</sub> -2D1D | 100 | 10.96 | 284 | 290 | 293 |
| 2 | 3.3  | 69.8 | 16.3 | 10.6 | 1,200 | G <sub>2</sub> -2D1D | 100 | 11.39 | 308 | 312 | 315 |
| 3 | 54.5 | 23.3 | 9.2  | 13.1 | 1,600 | G <sub>2</sub> -2D1D | 200 | 6.96  | 333 | 365 | 374 |
| 3 | 3.5  | 58.4 | 30.9 | 7.2  | 1,200 | G <sub>1</sub> -1D   | 0   | 17.01 | 81  | 82  | 82  |
| 3 | 14.6 | 52.7 | 24.3 | 8.4  | 800   | G <sub>1</sub> -1D   | 0   | 5.95  | 57  | 58  | 58  |
| 3 | 13.6 | 69.0 | 13.1 | 4.3  | 800   | G <sub>1</sub> -1D   | 0   | 6.27  | 62  | 64  | 64  |
| 3 | 31.0 | 45.6 | 15.6 | 7.8  | 800   | G <sub>1</sub> -1D   | 0   | 7.13  | 81  | 83  | 86  |
| 3 | 65.9 | 15.3 | 6.8  | 12.0 | 800   | G <sub>1</sub> -2D   | 0   | 6.73  | 47  | 50  | 53  |
| 3 | 80.7 | 11.6 | 2.5  | 5.2  | 1,200 | G <sub>1</sub> -1D   | 0   | 18.45 | 133 | 133 | 135 |
| 3 | 64.2 | 7.4  | 13.8 | 14.7 | 1,200 | G <sub>2</sub> -2D2D | 100 | 8.01  | 151 | 160 | 166 |
| 3 | 12.0 | 62.2 | 18.0 | 7.8  | 1,600 | G <sub>2</sub> -2D1D | 300 | 6.37  | 499 | 525 | 539 |
| 3 | 9.4  | 19.6 | 68.8 | 2.3  | 1,600 | G <sub>1</sub> -2D   | 0   | 17.12 | 38  | 44  | 46  |
| 3 | 5.7  | 79.0 | 7.7  | 7.6  | 1,600 | G <sub>2</sub> -2D2D | 300 | 6.16  | 649 | 660 | 671 |
| 3 | 42.0 | 40.3 | 9.7  | 7.9  | 1,600 | G <sub>1</sub> -1D   | 0   | 20.08 | 73  | 74  | 76  |
| 3 | 7.3  | 55.0 | 32.4 | 5.3  | 1,600 | G <sub>2</sub> -2D1D | 300 | 6.93  | 540 | 576 | 612 |
| 3 | 42.4 | 24.4 | 18.1 | 15.1 | 1,200 | G <sub>1</sub> -1D   | 0   | 7.49  | 89  | 90  | 91  |
| 3 | 10.3 | 28.6 | 59.2 | 2.0  | 800   | G <sub>1</sub> -2D   | 0   | 9.31  | 60  | 62  | 63  |
| 3 | 55.9 | 34.6 | 3.3  | 6.2  | 1,200 | G <sub>1</sub> -1D   | 0   | 18.83 | 44  | 45  | 45  |
| 3 | 38.2 | 20.8 | 37.5 | 3.5  | 1,200 | G <sub>1</sub> -1D   | 0   | 9.35  | 107 | 108 | 108 |

|   |      |      |      |      |       |                      |     |       |     |     |     |
|---|------|------|------|------|-------|----------------------|-----|-------|-----|-----|-----|
| 3 | 83.5 | 1.7  | 10.4 | 4.4  | 1,600 | G <sub>1</sub> -2D   | 0   | 41.67 | 77  | 86  | 94  |
| 3 | 32.0 | 32.1 | 32.2 | 3.7  | 800   | G <sub>1</sub> -1D   | 0   | 6.51  | 105 | 106 | 106 |
| 3 | 4.2  | 73.7 | 19.7 | 2.4  | 1,600 | G <sub>2</sub> -2D1D | 200 | 11.19 | 391 | 408 | 416 |
| 3 | 31.8 | 50.6 | 16.3 | 1.4  | 800   | G <sub>1</sub> -1D   | 0   | 20.24 | 37  | 37  | 38  |
| 3 | 90.3 | 3.7  | 4.7  | 1.3  | 800   | G <sub>2</sub> -2D1D | 200 | 14.49 | 265 | 283 | 299 |
| 4 | 12.5 | 53.2 | 24.3 | 10.0 | 1,600 | G <sub>2</sub> -2D1D | 100 | 5.12  | 260 | 261 | 263 |
| 4 | 23.6 | 63.4 | 11.0 | 1.9  | 800   | G <sub>1</sub> -1D   | 0   | 8.06  | 42  | 43  | 43  |
| 4 | 36.1 | 35.8 | 19.5 | 8.6  | 1,600 | G <sub>2</sub> -2D2D | 100 | 5.49  | 196 | 203 | 209 |
| 4 | 20.2 | 47.8 | 20.8 | 11.3 | 800   | G <sub>1</sub> -2D   | 0   | 6.21  | 35  | 37  | 38  |
| 4 | 5.8  | 86.3 | 5.7  | 2.2  | 1,200 | G <sub>2</sub> -2D2D | 100 | 12.66 | 220 | 224 | 229 |
| 4 | 20.0 | 56.1 | 17.3 | 6.7  | 1,200 | G <sub>2</sub> -2D1D | 200 | 4.96  | 363 | 386 | 402 |
| 4 | 15.3 | 77.0 | 2.1  | 5.7  | 800   | G <sub>2</sub> -2D2D | 100 | 8.51  | 211 | 217 | 222 |
| 4 | 19.9 | 37.1 | 41.4 | 1.6  | 1,600 | G <sub>2</sub> -2D1D | 100 | 8.42  | 214 | 225 | 229 |
| 4 | 36.3 | 58.9 | 3.5  | 1.3  | 1,200 | G <sub>2</sub> -2D1D | 100 | 9.31  | 215 | 222 | 225 |
| 4 | 38.3 | 31.2 | 20.1 | 10.4 | 1,600 | G <sub>1</sub> -2D   | 0   | 7.07  | 31  | 34  | 38  |
| 4 | 9.8  | 59.0 | 22.0 | 9.2  | 1,600 | G <sub>2</sub> -2D1D | 200 | 3.62  | 447 | 467 | 478 |
| 4 | 3.4  | 80.5 | 7.5  | 8.6  | 1,600 | G <sub>2</sub> -2D2D | 300 | 6.51  | 432 | 438 | 446 |
| 4 | 55.8 | 38.2 | 4.6  | 1.4  | 1,600 | G <sub>2</sub> -2D1D | 200 | 26.88 | 184 | 261 | 284 |
| 4 | 5.9  | 69.4 | 18.9 | 5.9  | 1,200 | G <sub>2</sub> -2D2D | 300 | 6.45  | 602 | 606 | 606 |
| 4 | 59.2 | 20.1 | 9.3  | 11.4 | 1,600 | G <sub>2</sub> -2D1D | 200 | 7.06  | 232 | 244 | 253 |
| 4 | 30.7 | 47.5 | 15.0 | 6.8  | 1,200 | G <sub>2</sub> -2D1D | 300 | 7.69  | 375 | 393 | 401 |
| 4 | 52.3 | 28.6 | 16.4 | 2.8  | 1,600 | G <sub>2</sub> -2D2D | 200 | 12.27 | 161 | 189 | 209 |
| 4 | 74.3 | 15.0 | 9.0  | 1.7  | 800   | G <sub>2</sub> -2D1D | 100 | 9.92  | 178 | 185 | 189 |
| 4 | 5.9  | 60.3 | 29.2 | 4.6  | 1,600 | G <sub>2</sub> -2D2D | 300 | 11.63 | 471 | 505 | 521 |
| 4 | 29.4 | 51.5 | 15.1 | 4.1  | 1,200 | G <sub>2</sub> -2D2D | 200 | 6.26  | 300 | 317 | 325 |
| 4 | 7.4  | 54.1 | 32.9 | 5.7  | 1,200 | G <sub>2</sub> -2D1D | 200 | 8.70  | 442 | 447 | 454 |
| 4 | 25.5 | 63.6 | 8.2  | 2.6  | 1,600 | G <sub>2</sub> -2D2D | 200 | 9.12  | 240 | 256 | 273 |
| 5 | 20.5 | 55.1 | 20.7 | 3.7  | 1,600 | G <sub>2</sub> -2D2D | 300 | 8.67  | 365 | 381 | 404 |
| 5 | 8.0  | 52.9 | 31.8 | 7.4  | 1,600 | G <sub>2</sub> -2D2D | 300 | 8.26  | 363 | 374 | 381 |
| 5 | 27.6 | 62.5 | 4.2  | 5.7  | 1,200 | G <sub>2</sub> -2D1D | 200 | 6.87  | 445 | 456 | 461 |

|   |      |      |      |      |       |                      |     |       |     |     |     |
|---|------|------|------|------|-------|----------------------|-----|-------|-----|-----|-----|
| 5 | 8.1  | 79.0 | 11.7 | 1.3  | 1,200 | G <sub>2</sub> –2D1D | 300 | 8.08  | 575 | 589 | 602 |
| 5 | 7.0  | 19.8 | 69.5 | 3.7  | 1,200 | G <sub>2</sub> –2D2D | 200 | 2.71  | 330 | 352 | 363 |
| 5 | 32.7 | 32.3 | 28.3 | 6.7  | 1,200 | G <sub>2</sub> –2D2D | 200 | 7.39  | 264 | 292 | 307 |
| 5 | 24.9 | 42.2 | 26.2 | 6.7  | 1,200 | G <sub>2</sub> –2D2D | 200 | 5.06  | 329 | 350 | 363 |
| 5 | 5.8  | 32.3 | 59.5 | 2.5  | 1,200 | G <sub>2</sub> –2D2D | 200 | 8.00  | 354 | 364 | 370 |
| 5 | 27.2 | 52.9 | 10.8 | 9.1  | 1,600 | G <sub>2</sub> –2D2D | 300 | 5.13  | 312 | 315 | 319 |
| 5 | 55.3 | 35.2 | 6.1  | 3.4  | 800   | G <sub>2</sub> –2D1D | 100 | 10.33 | 51  | 100 | 162 |
| 5 | 33.2 | 51.4 | 6.1  | 9.3  | 1,200 | G <sub>2</sub> –2D2D | 200 | 3.85  | 290 | 305 | 313 |
| 5 | 50.9 | 36.6 | 6.2  | 6.3  | 800   | G <sub>1</sub> –2D   | 0   | 11.63 | 32  | 37  | 38  |
| 5 | 13.6 | 71.0 | 8.3  | 7.1  | 1,200 | G <sub>1</sub> –2D   | 0   | 15.53 | 24  | 26  | 28  |
| 5 | 20.2 | 63.4 | 9.7  | 6.8  | 800   | G <sub>1</sub> –2D   | 0   | 11.36 | 33  | 35  | 36  |
| 5 | 78.7 | 9.3  | 3.3  | 8.7  | 1,200 | G <sub>2</sub> –2D2D | 100 | 6.52  | 199 | 214 | 226 |
| 5 | 10.0 | 57.1 | 27.5 | 5.4  | 1,600 | G <sub>2</sub> –2D2D | 200 | 8.72  | 236 | 296 | 338 |
| 5 | 33.0 | 45.8 | 13.9 | 7.3  | 1,600 | G <sub>2</sub> –2D2D | 200 | 8.45  | 324 | 369 | 396 |
| 5 | 63.7 | 26.9 | 7.6  | 1.8  | 1,600 | G <sub>1</sub> –1D   | 0   | 23.04 | 126 | 126 | 127 |
| 5 | 5.7  | 73.8 | 16.7 | 3.8  | 1,600 | G <sub>1</sub> –1D   | 0   | 26.25 | 63  | 64  | 64  |
| 5 | 11.4 | 79.4 | 4.7  | 4.5  | 1,200 | G <sub>2</sub> –2D2D | 200 | 8.83  | 333 | 345 | 350 |
| 5 | 22.7 | 22.6 | 49.2 | 5.5  | 1,200 | G <sub>2</sub> –2D2D | 100 | 4.08  | 200 | 215 | 222 |
| 5 | 51.4 | 27.4 | 13.1 | 8.1  | 1,600 | G <sub>1</sub> –1D   | 0   | 5.63  | 100 | 102 | 103 |
| 6 | 55.0 | 30.7 | 11.0 | 3.3  | 800   | G <sub>1</sub> –2D   | 0   | 10.26 | 27  | 30  | 30  |
| 6 | 84.1 | 1.6  | 7.0  | 7.4  | 1,600 | G <sub>2</sub> –2D1D | 100 | 15.46 | 200 | 203 | 206 |
| 6 | 11.7 | 45.7 | 36.0 | 6.6  | 1,200 | G <sub>2</sub> –2D2D | 200 | 4.29  | 343 | 361 | 371 |
| 6 | 16.1 | 26.0 | 52.3 | 5.6  | 1,600 | G <sub>2</sub> –2D1D | 100 | 11.01 | 172 | 183 | 190 |
| 6 | 35.1 | 46.2 | 9.0  | 9.7  | 1,200 | G <sub>1</sub> –1D   | 0   | 8.46  | 94  | 97  | 100 |
| 6 | 24.3 | 56.6 | 13.4 | 5.7  | 800   | G <sub>2</sub> –2D1D | 100 | 6.64  | 249 | 251 | 254 |
| 6 | 10.8 | 42.8 | 43.2 | 3.2  | 1,200 | G <sub>2</sub> –2D1D | 200 | 5.64  | 372 | 382 | 392 |
| 6 | 13.2 | 71.0 | 6.3  | 9.5  | 800   | G <sub>2</sub> –2D1D | 200 | 3.93  | 310 | 324 | 338 |
| 6 | 12.1 | 70.7 | 13.5 | 3.8  | 1,600 | G <sub>2</sub> –2D1D | 200 | 8.66  | 389 | 406 | 415 |
| 6 | 8.9  | 57.1 | 31.2 | 2.8  | 1,200 | G <sub>2</sub> –2D1D | 200 | 7.24  | 343 | 347 | 350 |
| 6 | 14.0 | 67.9 | 8.1  | 10.1 | 1,600 | G <sub>2</sub> –2D1D | 300 | 3.70  | 476 | 496 | 502 |

|   |      |      |      |     |       |                      |     |       |     |     |     |
|---|------|------|------|-----|-------|----------------------|-----|-------|-----|-----|-----|
| 6 | 40.7 | 40.6 | 16.9 | 1.9 | 1,200 | G <sub>2</sub> –2D1D | 200 | 16.13 | 315 | 331 | 343 |
| 6 | 24.4 | 68.9 | 5.5  | 1.3 | 1,200 | G <sub>2</sub> –2D2D | 200 | 15.20 | 433 | 456 | 472 |
| 6 | 38.8 | 29.6 | 29.2 | 2.4 | 1,200 | G <sub>2</sub> –2D2D | 100 | 6.46  | 150 | 157 | 162 |
| 6 | 34.0 | 27.2 | 31.2 | 7.6 | 1,200 | G <sub>1</sub> –2D   | 0   | 5.70  | 36  | 41  | 43  |
| 6 | 77.1 | 2.3  | 11.2 | 9.5 | 1,600 | G <sub>2</sub> –2D2D | 100 | 3.95  | 136 | 157 | 161 |
| 6 | 82.2 | 14.1 | 2.0  | 1.7 | 1,200 | G <sub>2</sub> –2D1D | 200 | 11.53 | 288 | 306 | 320 |
| 6 | 20.6 | 67.9 | 3.0  | 8.5 | 1,600 | G <sub>2</sub> –2D1D | 300 | 6.68  | 425 | 457 | 464 |
| 6 | 13.6 | 55.5 | 24.7 | 6.2 | 1,600 | G <sub>2</sub> –2D1D | 300 | 5.81  | 498 | 511 | 536 |
| 6 | 74.1 | 15.0 | 9.0  | 1.9 | 1,200 | G <sub>2</sub> –2D1D | 200 | 5.52  | 323 | 333 | 348 |
| 6 | 44.9 | 24.2 | 25.2 | 5.7 | 1,600 | G <sub>2</sub> –2D2D | 100 | 5.74  | 120 | 139 | 156 |
| 6 | 40.4 | 45.1 | 5.6  | 8.9 | 1,600 | G <sub>2</sub> –2D1D | 100 | 9.05  | 217 | 230 | 241 |
| 7 | 17.4 | 71.2 | 5.9  | 5.6 | 800   | G <sub>1</sub> –1D   | 0   | 9.18  | 44  | 44  | 44  |
| 7 | 47.8 | 20.8 | 24.5 | 6.8 | 800   | G <sub>1</sub> –1D   | 0   | 5.48  | 135 | 135 | 135 |
| 7 | 52.6 | 28.3 | 11.2 | 7.9 | 1,600 | G <sub>2</sub> –2D2D | 100 | 5.60  | 179 | 188 | 196 |
| 7 | 46.4 | 27.2 | 21.3 | 5.1 | 800   | G <sub>1</sub> –1D   | 0   | 9.78  | 64  | 65  | 65  |
| 7 | 43.1 | 23.4 | 30.5 | 3.0 | 1,600 | G <sub>2</sub> –2D1D | 100 | 15.67 | 210 | 217 | 225 |
| 7 | 65.3 | 17.9 | 12.5 | 4.3 | 1,600 | G <sub>2</sub> –2D1D | 200 | 8.76  | 250 | 308 | 340 |
| 7 | 41.8 | 34.7 | 15.6 | 7.8 | 1,200 | G <sub>2</sub> –2D1D | 200 | 4.74  | 327 | 336 | 345 |
| 7 | 28.1 | 50.6 | 14.0 | 7.3 | 800   | G <sub>1</sub> –1D   | 0   | 5.35  | 82  | 82  | 82  |
| 7 | 7.2  | 69.6 | 19.0 | 4.3 | 1,600 | G <sub>2</sub> –2D2D | 100 | 11.39 | 259 | 262 | 264 |
| 7 | 9.5  | 50.7 | 36.4 | 3.4 | 800   | G <sub>1</sub> –1D   | 0   | 7.09  | 76  | 76  | 77  |
| 7 | 45.2 | 32.4 | 12.8 | 9.7 | 1,200 | G <sub>2</sub> –2D2D | 100 | 6.97  | 211 | 215 | 219 |
| 7 | 75.4 | 4.5  | 11.3 | 8.8 | 1,200 | G <sub>2</sub> –2D2D | 100 | 9.90  | 227 | 231 | 235 |
| 7 | 58.5 | 17.3 | 15.4 | 8.8 | 1,600 | G <sub>2</sub> –2D1D | 100 | 6.75  | 212 | 221 | 232 |
| 7 | 52.9 | 22.9 | 21.5 | 2.8 | 1,200 | G <sub>2</sub> –2D1D | 200 | 10.33 | 301 | 340 | 359 |
| 7 | 22.0 | 38.1 | 36.1 | 3.8 | 1,200 | G <sub>2</sub> –2D1D | 200 | 8.66  | 410 | 425 | 434 |
| 7 | 2.7  | 65.9 | 25.7 | 5.7 | 1,600 | G <sub>1</sub> –2D   | 0   | 13.39 | 28  | 29  | 30  |
| 7 | 50.5 | 34.9 | 9.0  | 5.6 | 1,600 | G <sub>2</sub> –2D1D | 100 | 9.78  | 201 | 205 | 209 |
| 7 | 22.8 | 31.7 | 43.3 | 2.3 | 800   | G <sub>1</sub> –1D   | 0   | 13.26 | 74  | 75  | 75  |
| 7 | 20.5 | 27.9 | 49.3 | 2.3 | 1,200 | G <sub>2</sub> –2D2D | 200 | 5.94  | 502 | 526 | 528 |

|   |      |      |      |     |       |                      |     |       |     |     |     |
|---|------|------|------|-----|-------|----------------------|-----|-------|-----|-----|-----|
| 7 | 33.3 | 47.4 | 13.6 | 5.7 | 1,600 | G <sub>2</sub> –2D1D | 100 | 9.35  | 249 | 255 | 260 |
| 7 | 45.3 | 37.9 | 12.7 | 4.1 | 1,600 | G <sub>2</sub> –2D1D | 200 | 11.67 | 406 | 420 | 421 |
| 7 | 12.3 | 70.0 | 13.8 | 4.0 | 1,600 | G <sub>2</sub> –2D2D | 300 | 7.79  | 499 | 557 | 567 |

**Table S6. Testing data points for the prediction model.**

| ID | Composition Labels   |                     |                     |                    | Thickness Labels | Deformation Labels   | Strain Labels  | Electrical Labels | Response Labels         |                           |                          |
|----|----------------------|---------------------|---------------------|--------------------|------------------|----------------------|----------------|-------------------|-------------------------|---------------------------|--------------------------|
|    | MXene Loading (wt.%) | SWNT Loading (wt.%) | AuNP Loading (wt.%) | PVA Loading (wt.%) | Thickness (nm)   | Deformation Sequence | Pre-Strain (%) | $S_0$ (mS)        | $\varepsilon_{5\%}$ (%) | $\varepsilon_{7.5\%}$ (%) | $\varepsilon_{10\%}$ (%) |
| 01 | 42.0                 | 47.8                | 3.6                 | 6.6                | 1,200            | G <sub>2</sub> -2D2D | 200            | 11.40             | 304                     | 325                       | 337                      |
| 02 | 19.8                 | 68.4                | 7.0                 | 4.8                | 1,600            | G <sub>2</sub> -2D1D | 300            | 8.14              | 518                     | 529                       | 546                      |
| 03 | 32.3                 | 57.0                | 5.3                 | 5.3                | 1,600            | G <sub>1</sub> -2D   | 0              | 24.57             | 37                      | 37                        | 37                       |
| 04 | 54.3                 | 27.3                | 13.7                | 4.8                | 800              | G <sub>1</sub> -2D   | 0              | 13.55             | 41                      | 45                        | 49                       |
| 05 | 39.4                 | 44.0                | 6.1                 | 10.6               | 1,600            | G <sub>1</sub> -1D   | 0              | 8.48              | 75                      | 75                        | 75                       |
| 06 | 64.5                 | 22.0                | 6.4                 | 7.2                | 1,600            | G <sub>2</sub> -2D2D | 200            | 7.04              | 188                     | 209                       | 225                      |
| 07 | 65.6                 | 14.1                | 19.0                | 1.3                | 1,200            | G <sub>2</sub> -2D1D | 200            | 6.16              | 302                     | 326                       | 337                      |
| 08 | 15.7                 | 21.2                | 59.4                | 3.6                | 1,600            | G <sub>2</sub> -2D2D | 100            | 8.87              | 157                     | 165                       | 171                      |
| 09 | 21.9                 | 53.9                | 21.0                | 3.3                | 1,600            | G <sub>2</sub> -2D2D | 300            | 8.62              | 337                     | 369                       | 385                      |
| 10 | 55.4                 | 26.8                | 14.9                | 3.0                | 1,200            | G <sub>2</sub> -2D1D | 100            | 8.07              | 152                     | 172                       | 192                      |
| 11 | 49.1                 | 41.8                | 7.9                 | 1.2                | 1,600            | G <sub>2</sub> -2D1D | 100            | 19.08             | 160                     | 193                       | 207                      |
| 12 | 79.2                 | 12.4                | 3.2                 | 5.2                | 800              | G <sub>1</sub> -1D   | 0              | 22.73             | 91                      | 91                        | 91                       |
| 13 | 18.4                 | 74.6                | 3.4                 | 3.6                | 1,600            | G <sub>2</sub> -2D1D | 200            | 9.08              | 403                     | 407                       | 412                      |
| 14 | 21.7                 | 58.5                | 17.1                | 2.7                | 1,200            | G <sub>2</sub> -2D2D | 100            | 11.96             | 256                     | 265                       | 273                      |



**Table S7. 10 fabrication parameter sets of G<sub>1</sub>/G<sub>2</sub> stretchable nanocomposites to examine the model's prediction accuracy.**

|          | Composition Labels   |                     |                     |                    | Thickness Labels | Deformation Labels   | Strain Labels  | Electrical Labels | Response Labels      |                        |                       |
|----------|----------------------|---------------------|---------------------|--------------------|------------------|----------------------|----------------|-------------------|----------------------|------------------------|-----------------------|
| Recipe # | MXene Loading (wt.%) | SWNT Loading (wt.%) | AuNP Loading (wt.%) | PVA Loading (wt.%) | Thickness (nm)   | Deformation Sequence | Pre-Strain (%) | $S_0$ (mS)        | $\epsilon_{5\%}$ (%) | $\epsilon_{7.5\%}$ (%) | $\epsilon_{10\%}$ (%) |
| 1        | 44.0                 | 39.4                | 6.1                 | 10.6               | 1,600            | G <sub>1</sub> –1D   | 0              | 8.48              | 74                   | 74                     | 76                    |
| 2        | 20.0                 | 61.0                | 15.0                | 4.0                | 1,200            | G <sub>1</sub> –1D   | 0              | 5.57              | 67                   | 67                     | 67                    |
| 3        | 27.3                 | 54.3                | 13.7                | 4.8                | 800              | G <sub>1</sub> –2D   | 0              | 13.55             | 38                   | 42                     | 45                    |
| 4        | 47.7                 | 19.6                | 31.4                | 1.2                | 800              | G <sub>1</sub> –2D   | 0              | 13.51             | 62                   | 64                     | 66                    |
| 5        | 41.8                 | 49.1                | 7.9                 | 1.2                | 1,600            | G <sub>2</sub> –2D1D | 100            | 19.08             | 164                  | 200                    | 219                   |
| 6        | 74.6                 | 18.4                | 3.4                 | 3.6                | 1,600            | G <sub>2</sub> –2D1D | 200            | 9.08              | 388                  | 409                    | 407                   |
| 7        | 68.4                 | 19.8                | 7.0                 | 4.7                | 1,600            | G <sub>2</sub> –2D1D | 300            | 8.14              | 504                  | 521                    | 550                   |
| 8        | 58.5                 | 21.7                | 17.1                | 2.7                | 1,200            | G <sub>2</sub> –2D2D | 100            | 119.62            | 246                  | 261                    | 274                   |
| 9        | 47.8                 | 42.0                | 3.6                 | 6.6                | 1,200            | G <sub>2</sub> –2D2D | 200            | 114.03            | 312                  | 314                    | 327                   |
| 10       | 53.9                 | 21.8                | 21.0                | 3.3                | 1,600            | G <sub>2</sub> –2D2D | 300            | 86.21             | 355                  | 365                    | 400                   |

**Table S8. Correlation parameters used in the deflection functions of FE models.**

| Stretchable Nanocomposite | Buckling Mode | A ( $\mu\text{m}$ ) | B ( $\mu\text{m}$ ) | C ( $\mu\text{m}$ ) | D ( $\mu\text{m}$ ) | $\lambda$ ( $\mu\text{m}$ ) |
|---------------------------|---------------|---------------------|---------------------|---------------------|---------------------|-----------------------------|
| G <sub>1</sub> -1D        | Cylindrical   | 16                  | 0                   | 0                   | 0                   | 35                          |
| G <sub>1</sub> -2D        | Checkerboard  | 33                  | 0                   | 0                   | 33                  | 44                          |
| G <sub>2</sub> -2D1D      | Cylindrical   | 105                 | 0                   | 0                   | 0                   | 70                          |
| G <sub>2</sub> -2D2D      | Undulating    | 105                 | 53                  | 0                   | 0                   | 70                          |

A, B, C, and D are the correlation parameters,  $\lambda$  is the wavelength characterized from Keyence microscope. The thicknesses of G<sub>1</sub>/G<sub>2</sub> stretchable nanocomposites were set to be 800 nm.

**Table S9. Summary of influential components identified in different data analysis methods.**

| Data Analysis Method       | Electrical and Response Labels                                 |                                                                         |
|----------------------------|----------------------------------------------------------------|-------------------------------------------------------------------------|
|                            | $S_0$ (mS)                                                     | $\varepsilon_{10\%}$ (%)                                                |
| Spearman's $\rho$ Analysis | PVA Loading (–)                                                | Deformation Sequence (+)<br>Applied Pre-Strain (+)                      |
| SHAP Model Interpretation  | MXene Loading (+)<br>PVA Loading (–)<br>Applied Pre-Strain (–) | Deformation Sequence (+)<br>Applied Pre-Strain (+)<br>MXene Loading (–) |

**Table S10. Comparison of our robotics/ML-integrated framework with the state-of-the-art works in the fields of stretchable conductors**

| Design Strategy                  | Fabrication Method     | Building Block                       | Electrical Property at Relaxed State | Maximum Stretchability | $\epsilon_{10\%}$ | Durability                                                                                                                               | Ref.      |
|----------------------------------|------------------------|--------------------------------------|--------------------------------------|------------------------|-------------------|------------------------------------------------------------------------------------------------------------------------------------------|-----------|
| Robotics/ML-integrated framework | Sequential deformation | MXene/SWNT/AuNP/PVA + thin Au layer  | $2.5 \times 10^6 \text{ S m}^{-1}$   | 1,300%                 | 1,025%            | 80k cycles under 400% elongation<br>50k cycles under 600% elongation<br>20k cycles at 700% elongation                                    | This work |
| Design of experiment             | Heterogeneous blending | EGaIn + PU                           | $2.1 \times 10^6 \text{ S m}^{-1}$   | 4,100%                 | 310%              | 15k cycles under 100% elongation<br>8k cycles under 300% elongation<br>1.2k cycles under 500% elongation                                 | 12        |
| Design of experiment             | Bilayer integration    | EGaIn + VHB                          | $2.1 \times 10^6 \text{ S m}^{-1}$   | 1,000%                 | 160%              | 1.5k cycles under 500% elongation                                                                                                        | 13        |
| Design of experiment             | Heterogeneous blending | EGaIn + SBS                          | $1.8 \times 10^6 \text{ S m}^{-1}$   | 1,800%                 | 100%              | 150 cycles under elongation<br>200 cycles under 1,000% elongation<br>1k cycles under 500% elongation<br>25k cycles under 100% elongation | 14        |
| Design of experiment             | Heterogeneous blending | EGaIn/Ag flakes + SIB                | $8.2 \times 10^5 \text{ S m}^{-1}$   | 1,200%                 | 100%              | 1k cycles under 100% elongation<br>550 cycles under 400% elongation                                                                      | 15        |
| Design of experiment             | Heterogeneous blending | EGaIn + 11-phosphonoundecyl acrylate | $2.5 \times 10^5 \text{ S m}^{-1}$   | 750%                   | 320%              | 10k cycles under 100% elongation                                                                                                         | 16        |
| Design of experiment             | Bilayer integration    | EGaIn + pp-TPU                       | $2.3 \times 10^6 \text{ S m}^{-1}$   | 2,260%                 | 670%              | 10k cycles under 100% elongation                                                                                                         | 17        |
| Design of experiment             | Heterogeneous blending | EGaIn/Ag flakes + EVA                | $8.3 \times 10^5 \text{ S m}^{-1}$   | 1,000%                 | 150%              | 10k cycles under 800% elongation                                                                                                         | 18        |
| Design of experiment             | Heterogeneous blending | Ag flakes + Ecoflex                  | $1.3 \times 10^4 \text{ S m}^{-1}$   | 1,780%                 | 11%               | 1k cycles under 50% elongation                                                                                                           | 19        |
| Design of experiment             | Heterogeneous blending | AgNW/CNT + PVDF                      | $5.7 \times 10^5 \text{ S m}^{-1}$   | 140%                   | 15%               | 5k cycles under 20% elongation                                                                                                           | 20        |
| Design of experiment             | Heterogeneous blending | AgNW/Au + SBS                        | $4.2 \times 10^6 \text{ S m}^{-1}$   | 840%                   | 10%               | 3k cycles under 30% elongation                                                                                                           | 21        |

|                      |                        |                                   |                                    |        |      |                                  |               |
|----------------------|------------------------|-----------------------------------|------------------------------------|--------|------|----------------------------------|---------------|
| Design of experiment | Heterogeneous blending | AuNP + PU                         | $1.1 \times 10^6 \text{ S m}^{-1}$ | 480%   | 4%   | 10k cycles under 5% elongation   | <sup>3</sup>  |
| Design of experiment | Heterogeneous blending | Ag flakes + PAA                   | $3.7 \times 10^4 \text{ S m}^{-1}$ | 250%   | 10%  | 1k cycles under 100% elongation  | <sup>22</sup> |
| Design of experiment | Heterogeneous blending | Ag flakes + alginate/PAM hydrogel | $1.4 \times 10^5 \text{ S m}^{-1}$ | 1,000% | 300% | 200 cycles under 300% elongation | <sup>23</sup> |
| Design of experiment | Heterogeneous blending | Ag flakes + fluorine rubbers      | $4.0 \times 10^5 \text{ S m}^{-1}$ | 400%   | 85%  | 547 cycles under 50% elongation  | <sup>24</sup> |
| Design of experiment | Heterogeneous blending | PEDOT:PSS + STEC                  | $3.4 \times 10^5 \text{ S m}^{-1}$ | 800%   | 45%  | 1k cycles under 100% elongation  | <sup>25</sup> |
| Design of experiment | Heterogeneous blending | PEDOT:PSS + PR                    | $7.0 \times 10^4 \text{ S m}^{-1}$ | 125%   | 25%  | 100 cycles under 40% elongation  | <sup>26</sup> |
| Design of experiment | Heterogeneous blending | PEDOT:PSS + EMIM TCB              | $1.0 \times 10^5 \text{ S m}^{-1}$ | 180%   | 20%  | 20 cycles under 40% elongation   | <sup>27</sup> |
| Design of experiment | Heterogeneous blending | Graphene flakes + TPU             | $4.3 \times 10^2 \text{ S m}^{-1}$ | 500%   | 300% | 10k cycles under 300% elongation | <sup>28</sup> |
| Design of experiment | Heterogeneous blending | CNT/graphite + PDMS               | $1.3 \times 10^2 \text{ S m}^{-1}$ | 150%   | 130% | 1k cycles under 60% elongation   | <sup>29</sup> |
| Design of experiment | Heterogeneous blending | CNT + PU                          | $1.0 \times 10^2 \text{ S m}^{-1}$ | 300%   | 30%  | 100 cycles under 80% elongation  | <sup>30</sup> |
| Design of experiment | Bilayer integration    | CNT + PDMS                        | $1.1 \times 10^5 \text{ S m}^{-1}$ | 150%   | 14%  | 10k cycles under 25% elongation  | <sup>31</sup> |

Abbreviations: SWNT – single-walled carbon nanotubes; AuNP– gold nanoparticle; PVA – poly(vinyl alcohol); EGaIn – eutectic gallium-indium; PU – polyurethane; EVA – ethylene vinyl acetate copolymer; SIB – styrene–isoprene block copolymers; SBS – poly(styrene-block-butadiene-block-styrene); pp-TPU – polyester polyol-rich thermoplastic polyurethane; VHB – very high bond; AgNW – silver nanowire; PAA – polyacrylamide alginate; CNT – carbon nanotube; PVDF – polyvinylidene fluoride; PAM – polyacrylamide; PEDOT:PSS – poly(3,4-ethylenedioxythiophene): poly(styrene sulfonate); PVDF – polyvinylidene fluoride; STEC – stretchability and electrical conductivity; EMIM TCB – 1-ethyl-3-methylimidazolium tetracyanoborate; PR – polyrotaxane; PDMS – polydimethylsiloxane.

**Table S11. Fitted EIS parameters of stretchable Zn//MnO<sub>2</sub> batteries at different stretching states.**

| Stretching State | $R_{\text{int}}$ ( $\Omega$ ) | $R_{\text{ct}}$ ( $\Omega$ ) |
|------------------|-------------------------------|------------------------------|
| 0%               | 18.1                          | 2.42                         |
| 300%             | 17.2                          | 2.86                         |

**Equivalent Circuit Model**

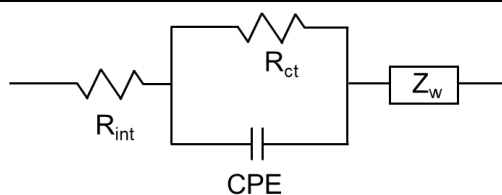

The parameters were obtained using the equivalent circuit model shown above, where  $R_{\text{int}}$ ,  $R_{\text{ct}}$ , and  $Z_w$  represent the internal resistance, the charge transfer resistance, and the Warburg impedance that is related to the diffusion of  $\text{Zn}^{2+}$  at low frequencies, respectively. CPE is the constant phase element.

**Table S12. Comparison of our stretchable Zn//MnO<sub>2</sub> battery with the state-of-the-art stretchable Zn-based and Li-ion batteries with co-planar configurations.**

| Stretchable Battery  | Uniaxial Stretchability (%) | Electrolyte (Condition)                                                            | Specific Capacity at Relaxed State                      | Rechargeability | Ref.      |
|----------------------|-----------------------------|------------------------------------------------------------------------------------|---------------------------------------------------------|-----------------|-----------|
| Zn//MnO <sub>2</sub> | 300%                        | 2.0 M ZnSO <sub>4</sub><br>0.2 M MnSO <sub>4</sub><br>PVA Gel<br>(Neutral)         | 260 mAh g <sup>-1</sup><br>@ 100 mA g <sup>-1</sup>     | Yes             | This work |
| Zn@Ti-MXene//V-MXene | 50%                         | 2.0 M ZnCl <sub>2</sub><br>2.0 M LiCl<br>PVA Gel<br>(Neutral)                      | 118.5 mAh g <sup>-1</sup><br>@ 50 mA g <sup>-1</sup>    | Yes             | 32        |
| Zn//MnO <sub>2</sub> | 50%                         | 2.0 M ZnSO <sub>4</sub><br>0.5 M MnSO <sub>4</sub><br>PAM Gel<br>(Neutral)         | 75.6 mAh g <sup>-1</sup><br>@ 308 mA g <sup>-1</sup>    | Yes             | 33        |
| Zn//MnO <sub>2</sub> | 25%                         | 40 wt.% KOH<br>CMC Gel<br>(Alkaline)                                               | 20.4 mAh g <sup>-1</sup><br>@ 0.6 mA g <sup>-1</sup>    | No              | 34        |
| Zn//MnO <sub>2</sub> | 50%                         | 26 wt.% NH <sub>4</sub> Cl<br>8 wt.% ZnCl <sub>2</sub><br>Xanthan Gel<br>(Neutral) | 3.5 mAh cm <sup>-2</sup><br>@ 0.5 mA cm <sup>-2</sup>   | No              | 35        |
| Zn//MnO <sub>2</sub> | 100%                        | PAA Gel<br>(Alkaline)                                                              | 2.3 mAh cm <sup>-2</sup><br>@ 0.12 mA cm <sup>-2</sup>  | No              | 36        |
| Zn//MnO <sub>2</sub> | 100%                        | 6.0 M KOH<br>0.4 M ZnO<br>PAA Gel<br>(Alkaline)                                    | 3.8 mAh cm <sup>-2</sup><br>@ 0.175 mA cm <sup>-2</sup> | No              | 37        |

|                                     |       |                                                                                                                 |                                                        |     |    |
|-------------------------------------|-------|-----------------------------------------------------------------------------------------------------------------|--------------------------------------------------------|-----|----|
| Zn//Ag                              | 100%  | 6.0 M KOH<br>1.0 M LiOH<br>PAA Gel<br>(Alkaline)                                                                | 2.5 mAh cm <sup>-2</sup><br>@ 3 mA cm <sup>-2</sup>    | Yes | 38 |
| Zn//Ag                              | 80%   | 10 M NaOH<br>(Alkaline)                                                                                         | 0.05 mAh cm <sup>-2</sup><br>@ 1.0 mA cm <sup>-2</sup> | Yes | 39 |
| Zn//Ag                              | 11.1% | 6.0 M KOH<br>1.0 M LiOH<br>PAA Gel<br>(Alkaline)                                                                | 0.6 mAh cm <sup>-2</sup><br>@ 0.15 mA cm <sup>-2</sup> | Yes | 40 |
| Zn//Ni-Co                           | 50%   | 1.0 M KOH<br>0.02 M Zn(Ac) <sub>2</sub><br>0.005 M LiOH<br>0.005 M Ca(OH) <sub>2</sub><br>PVA Gel<br>(Alkaline) | 105 mAh g <sup>-1</sup><br>@ 1.0 A g <sup>-1</sup>     | Yes | 41 |
| V <sub>2</sub> O <sub>5</sub> //LMO | 50%   | 10 M LiTFSI<br>(Neutral)                                                                                        | 100 mAh g <sup>-1</sup><br>@ 120 mA g <sup>-1</sup>    | Yes | 42 |
| AC//LMO                             | 100%  | 1.0 M Li <sub>2</sub> SO <sub>4</sub><br>(Neutral)                                                              | 90 mAh g <sup>-1</sup><br>@ 1.8 A g <sup>-1</sup>      | Yes | 43 |

Abbreviations: PVA – poly(vinyl alcohol); PAM – polyacrylamide; CMC – carboxymethyl cellulose sodium salt; PAA – polyacrylic acid; Ac – acetate, [CH<sub>3</sub>COO<sup>-</sup>]; LMO – LiMn<sub>2</sub>O<sub>4</sub>; LiTFSI – lithium bis(trifluoromethanesulfonyl)imide; AC – active carbon.

**Movie S1. Automated pipetting robot for preparing various MXene/SWNT/AuNP/PVA mixtures.**

**Movie S2. FE simulation of G<sub>2</sub>-2D1D and G<sub>2</sub>-2D2D stretchable nanocomposites under uniaxial elongations in top and perspective views.**



## Supporting Reference

- 1 Wang, J., Ma, X., Zhou, J., Du, F. & Teng, C. Bioinspired, high-strength, and flexible mxene/aramid fiber for electromagnetic interference shielding papers with joule heating performance. *ACS Nano* **16**, 6700–6711 (2022).
- 2 Cai, L. *et al.* Highly transparent and conductive stretchable conductors based on hierarchical reticulate single-walled carbon nanotube architecture. *Adv. Funct. Mater.* **22**, 5238–5244 (2012).
- 3 Kim, Y. *et al.* Stretchable nanoparticle conductors with self-organized conductive pathways. *Nature* **500**, 59–63 (2013).
- 4 Awad, M. & Khanna, R. *Efficient learning machines: theories, concepts, and applications for engineers and system designers* (Springer Nature, 2015).
- 5 Head, T., Kumar, M., Nahrstaedt, H., Louppe, G. & Shcherbatyi, I. Scikit-optimize/scikit-optimize: V0.9.0. (2021).
- 6 Audoly, B. & Boudaoud, A. Buckling of a stiff film bound to a compliant substrate—part ii. *J. Mech. Phys. Solids* **56**, 2422–2443 (2008).
- 7 Cai, S., Breid, D., Crosby, A. J., Suo, Z. & Hutchinson, J. W. Periodic patterns and energy states of buckled films on compliant substrates. *J. Mech. Phys. Solids* **59**, 1094–1114 (2011).
- 8 Huang, R. *Mechanical self-assembly: Science and applications* 69–109 (Springer, 2012).
- 9 Inc, T. Matlab version: 9.13.0 (r2022b). *The MathWorks Inc* (2022).
- 10 Yang, H. *et al.* Wireless  $\text{Ti}_3\text{C}_2\text{T}_x$  MXene strain sensor with ultrahigh sensitivity and designated working windows for soft exoskeletons. *ACS Nano* **14**, 11860–11875 (2020).
- 11 Chen, T. *et al.* Machine intelligence-accelerated discovery of all-natural plastic substitutes.

- Nat. Nanotechnol.* (2024).
- 12 Lee, W. *et al.* Universal assembly of liquid metal particles in polymers enables elastic printed circuit board. *Science* **378**, 637–641 (2022).
  - 13 Liu, S., Shah, D. S. & Kramer-Bottiglio, R. Highly stretchable multilayer electronic circuits using biphasic gallium-indium. *Nat. Mater.* **20**, 851–858 (2021).
  - 14 Ma, Z. *et al.* Permeable superelastic liquid-metal fibre mat enables biocompatible and monolithic stretchable electronics. *Nat. Mater.* **20**, 859–868 (2021).
  - 15 Lopes, P. A., Santos, B. C., de Almeida, A. T. & Tavakoli, M. Reversible polymer-gel transition for ultra-stretchable chip-integrated circuits through self-soldering and self-coating and self-healing. *Nat. Commun.* **12**, 4666 (2021).
  - 16 Thrasher, C. J., Farrell, Z. J., Morris, N. J., Willey, C. L. & Tabor, C. E. Mechanoresponsive polymerized liquid metal networks. *Adv. Mater.* **31**, 1903864 (2019).
  - 17 Chen, S. *et al.* Ultrahigh strain-insensitive integrated hybrid electronics using highly stretchable bilayer liquid metal based conductor. *Adv. Mater.* **35**, 2208569 (2023).
  - 18 Wang, J. *et al.* Printable superelastic conductors with extreme stretchability and robust cycling endurance enabled by liquid-metal particles. *Adv. Mater.* **30**, 1706157 (2018).
  - 19 Kim, S. H. *et al.* Ultrastretchable conductor fabricated on skin-like hydrogel-elastomer hybrid substrates for skin electronics. *Adv. Mater.* **30**, 1800109 (2018).
  - 20 Chun, K. Y. *et al.* Highly conductive, printable and stretchable composite films of carbon nanotubes and silver. *Nat. Nanotechnol.* **5**, 853–857 (2010).
  - 21 Choi, S. *et al.* Highly conductive, stretchable and biocompatible Ag-Au core-sheath nanowire composite for wearable and implantable bioelectronics. *Nat. Nanotechnol.* **13**, 1048–1056 (2018).

- 22 Ohm, Y. *et al.* An electrically conductive silver–polyacrylamide–alginate hydrogel composite for soft electronics. *Nat. Electron.* **4**, 185–192 (2021).
- 23 Hui, Y. *et al.* Three-dimensional printing of soft hydrogel electronics. *Nat. Electron.* **5**, 893–903 (2022).
- 24 Matsuhisa, N. *et al.* Printable elastic conductors by *in situ* formation of silver nanoparticles from silver flakes. *Nat. Mater.* **16**, 834–840 (2017).
- 25 Wang, Y. *et al.* A highly stretchable, transparent, and conductive polymer. *Sci. Adv.* **3**, e1602076 (2017).
- 26 Zhang, Z. *et al.* High-brightness all-polymer stretchable led with charge-trapping dilution. *Nature* **603**, 624–630 (2022).
- 27 Teo, M. Y. *et al.* Highly stretchable and highly conductive PEDOT:PSS/ionic liquid composite transparent electrodes for solution-processed stretchable electronics. *ACS Appl. Mater. Interfaces* **9**, 819–826 (2017).
- 28 Park, H. J. *et al.* Fluid-dynamics-processed highly stretchable, conductive, and printable graphene inks for real-time monitoring sweat during stretching exercise. *Adv. Funct. Mater.* **31**, 2011059 (2021).
- 29 Zhang, F. *et al.* 3D interconnected conductive graphite nanoplatelet welded carbon nanotube networks for stretchable conductors. *Adv. Funct. Mater.* **31**, 2107082 (2021).
- 30 Shin, M. K. *et al.* Elastomeric conductive composites based on carbon nanotube forests. *Adv. Mater.* **22**, 2663–2667 (2010).
- 31 Lipomi, D. J. *et al.* Skin-like pressure and strain sensors based on transparent elastic films of carbon nanotubes. *Nat. Nanotechnol.* **6**, 788–792 (2011).
- 32 Li, Y. *et al.* Stretchable Zn-ion hybrid battery with reconfigurable  $V_2CT_x$  and  $Ti_3C_2T_x$

- MXene electrodes as a magnetically actuated soft robot. *Adv. Energy Mater.* **11**, 2101862 (2021).
- 33 Liu, T., Chen, X., Tervoort, E., Kraus, T. & Niederberger, M. Design and fabrication of transparent and stretchable zinc ion batteries. *ACS Appl. Energy Mater.* **4**, 6166–6179 (2021).
- 34 Kettlgruber, G. *et al.* Intrinsically stretchable and rechargeable batteries for self-powered stretchable electronics. *J. Mater. Chem. A* **1**, 5505–5508 (2013).
- 35 Kaltenbrunner, M., Kettlgruber, G., Siket, C., Schwodiauer, R. & Bauer, S. Arrays of ultracompliant electrochemical dry gel cells for stretchable electronics. *Adv. Mater.* **22**, 2065–2076 (2010).
- 36 Zhu, H.-W. *et al.* Dip-coating processed sponge-based electrodes for stretchable Zn-MnO<sub>2</sub> batteries. *Nano Res.* **11**, 1554–1562 (2018).
- 37 Gaikwad, A. M. *et al.* Highly stretchable alkaline batteries based on an embedded conductive fabric. *Adv. Mater.* **24**, 5071–5076 (2012).
- 38 Kumar, R. *et al.* All-printed, stretchable Zn-Ag<sub>2</sub>O rechargeable battery *via* hyperelastic binder for self-powering wearable electronics. *Adv. Energy Mater.* **7**, 1602096 (2016).
- 39 Yan, C. *et al.* Stretchable silver-zinc batteries based on embedded nanowire elastic conductors. *Adv. Energy Mater.* **4**, 1301396 (2013).
- 40 Berchmans, S. *et al.* An epidermal alkaline rechargeable Ag–Zn printable tattoo battery for wearable electronics. *J. Mater. Chem. A* **2**, 15788–15795 (2014).
- 41 Guo, Z. H. *et al.* Stretchable textile rechargeable zn batteries enabled by a wax dyeing method. *Adv. Mater. Technol.* **5**, 2000544 (2020).
- 42 Chen, Z.-F. *et al.* A thin, intrinsically stretchable MXene-MWCNTs/polymer current

- collector for deformable aqueous Li-ion batteries. *J. Mater. Chem. A* **12**, 2444–2455 (2024).
- 43 Song, W. J. *et al.* Jabuticaba-inspired hybrid carbon filler/polymer electrode for use in highly stretchable aqueous Li-ion batteries. *Adv. Energy Mater.* **8**, 1702478 (2018).
